# Supplementary material
Source: PubMed Central journal article supplement (PMC3506006)
Supplement: NIHMS411881-supplement-1_si_001.pdf [file NIHMS411881-supplement-1_si_001.pdf]

*Supporting Information for*

***Spectroscopic and DFT Studies of Second Sphere Variants of  
the Type 1 Copper Site in Azurin: Covalent and Non-Local  
Electrostatic Contributions to Reduction Potentials***

Ryan G. Hadt,<sup>†</sup> Ning Sun,<sup>†</sup> Nicholas M. Marshall,<sup>‡</sup> Keith O. Hodgson,<sup>†,§</sup> Britt Hedman,<sup>§</sup> Yi  
Lu,<sup>\*,‡</sup> and Edward I. Solomon<sup>\*,†,§</sup>

<sup>†</sup> Department of Chemistry, Stanford University, Stanford, CA 94305

<sup>§</sup> Stanford Synchrotron Radiation Lightsource, SLAC National Accelerator Laboratory,  
Stanford University, Menlo Park, CA 94025

<sup>‡</sup> Department of Chemistry, University of Illinois, Urbana-Champaign, Illinois 61801

**Figure S1.** L- (left) and S- (right) type structural models. Atom coloring: Cu (brown); S (yellow); O (red); N (blue); C (green); F (magenta). Hydrogen atoms are omitted, and the S(Met) orientation is out of the page.

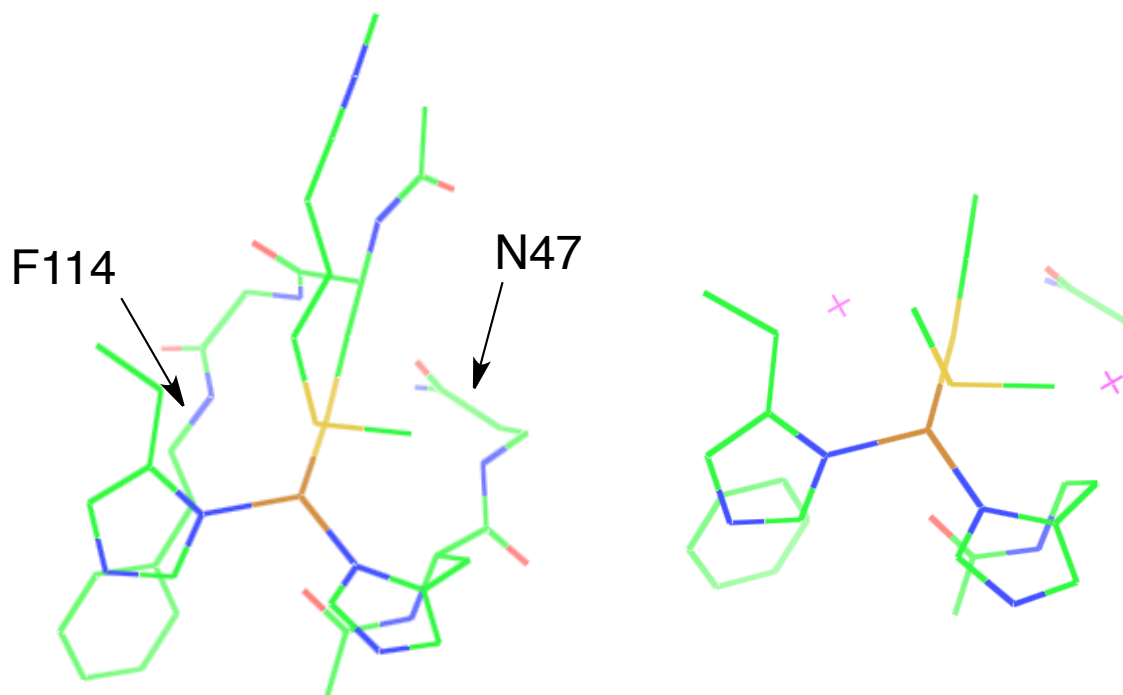

**Figure S2.** Orientation dependence of N114. Atom coloring as in Figure S1. Dotted lines represent potential H-bonding interactions. The N114 R-group prefers the pictured orientation due to a preference for H-bonding to the carbonyl of the S(Cys)-N(His) loop.

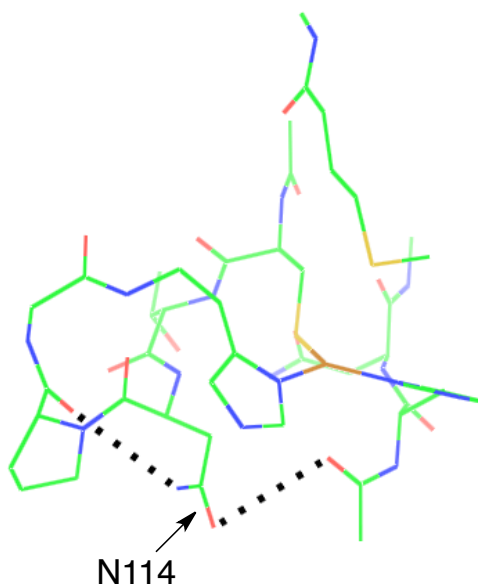

**Figure S3.** Low-temperature electronic absorption (top) and MCD (bottom) spectra of (A) WT Az, (B) F114N Az, (C) N47S Az, and (D) F114P Az. Simultaneous Gaussian fits are shown as dotted lines.

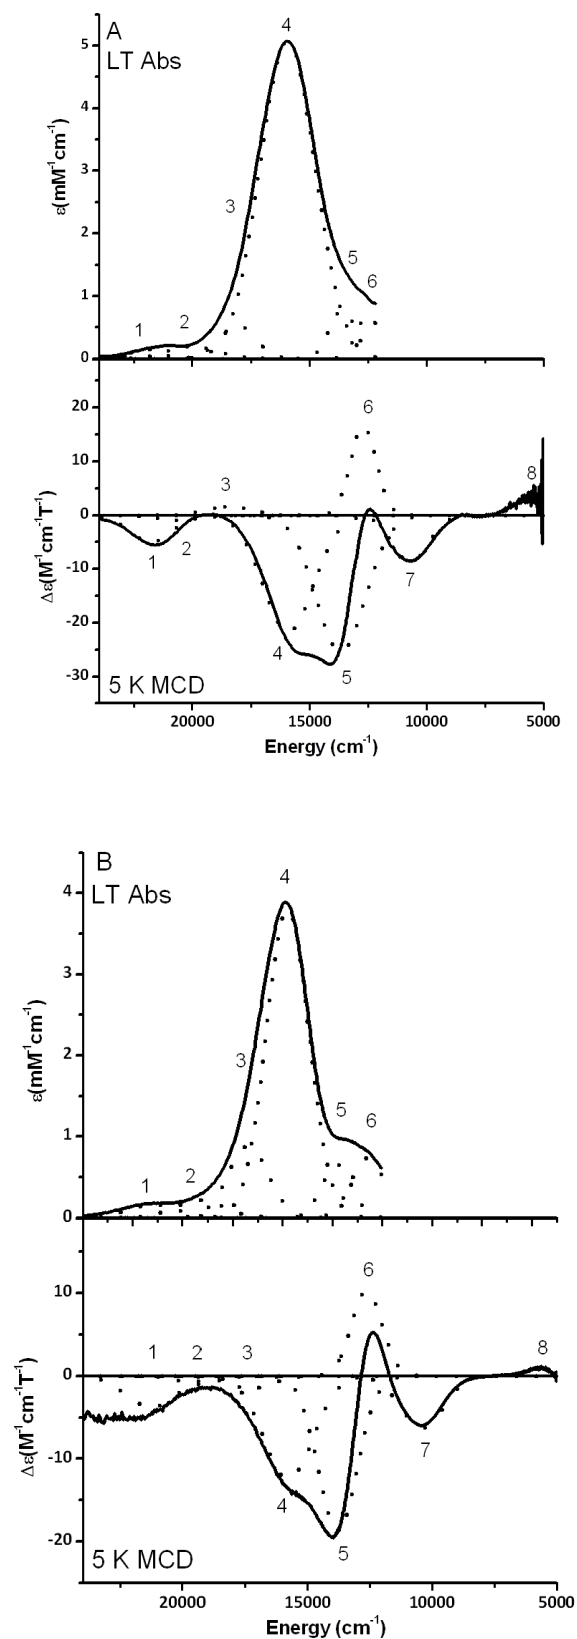

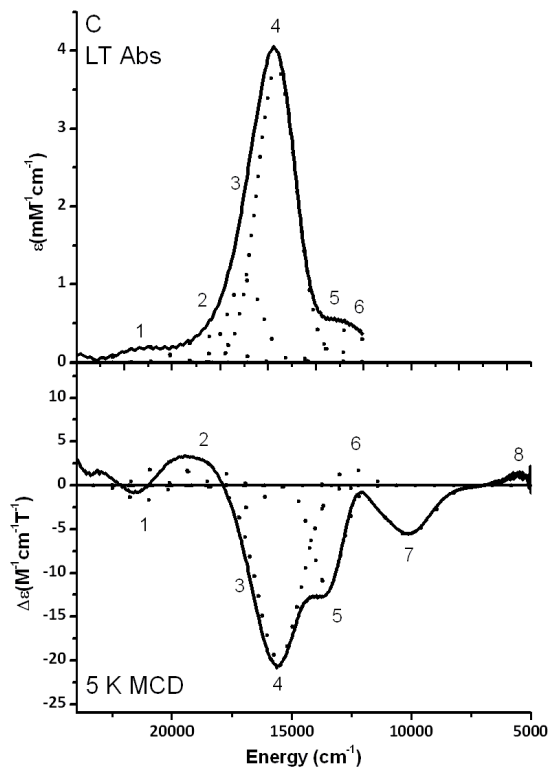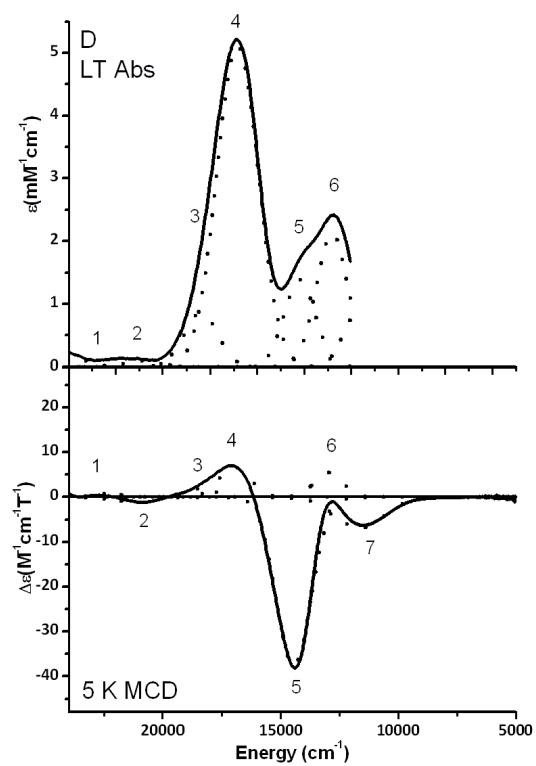

**Figure S4.** Geometric parameters for different dipole orientations considered in Section 3.2.3. Bonds are given in Å and angles in degrees. Note that orientation 1 and 2 are the same as 5 and 4, respectively, except on the opposite side of the Cu-S bond.

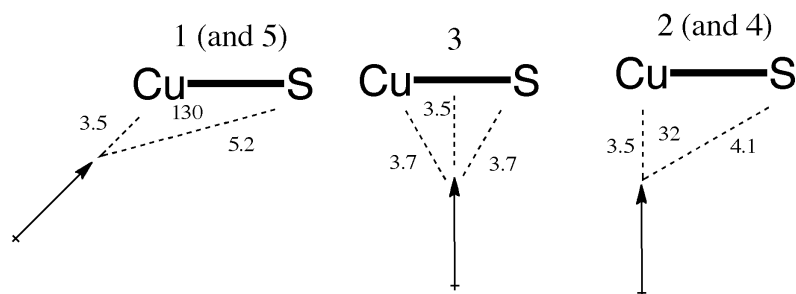

**Figure S5.** TDDFT calculated electronic absorption spectra of T1 sites taken from 1JZF and 2GHZ crystal structures.

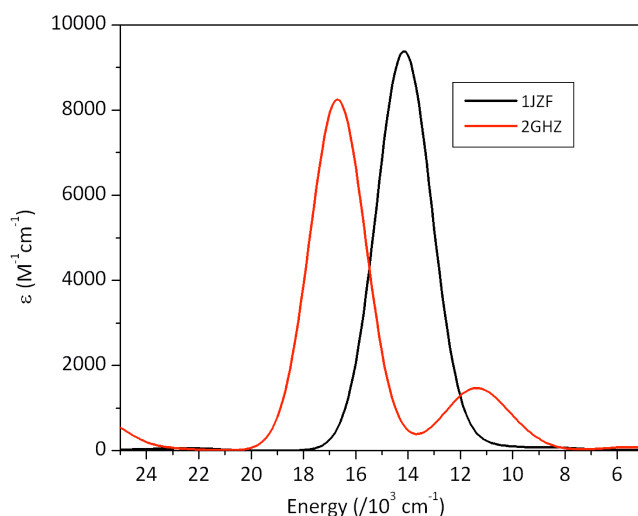

Figure S5 was obtained as follows: the T1 active sites were extracted from the X-ray crystal structures of 1JZF (WT Az) and 2GHZ (F114P) and hydrogen atoms were added at the clipping points. No second sphere interactions are included. Partial geometry optimization involved optimization of all hydrogen atoms while constraining all heavy atoms. The three structural changes to the thiolate orientation in F114P relative to WT Az are: 1) the  $N_1$ -Cu-S(Cys) angle opens up from  $\sim 123^\circ$  to  $\sim 139^\circ$  (note the notation of  $N_1$  (or  $N_r$ ) refers to the His ligand on the left

(or right) side as viewed along the Cu-S(Cys) bond (see Figure 1 of main text); 2) the  $N_r$ -Cu-S- $C_\beta$  dihedral angle rotates from  $\sim 83^\circ$  to  $\sim 128^\circ$ ; and 3) the Cu-S- $C_\beta$ - $C_\alpha$  dihedral rotates from  $\sim 174^\circ$  to  $\sim 146^\circ$ . These were each applied separately and additively to the WT Az model (1JZF) and the TDDFT calculation was repeated (Figure S6). Models that contain perturbation 2 (i.e. rotation of the  $N_r$ -Cu-S- $C_\beta$  dihedral angle from  $\sim 83^\circ$  to  $\sim 128^\circ$ ) show an increased intensity of the ligand field  $d_{xz/yz}$  transitions.

**Figure S6.** TDDFT calculated electronic absorption spectra for perturbed WT Az models.

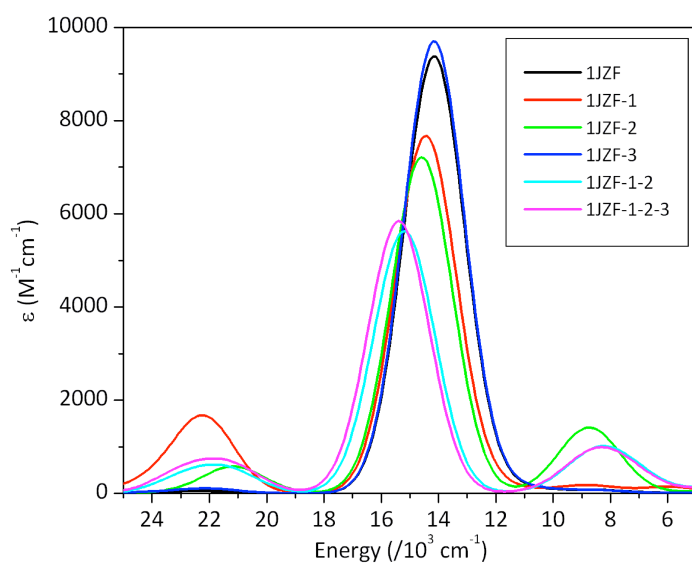

**Table S1.** DFT calculated H-Bond IE distance dependence (values relative to H-bond at 10 Å).

| H-Bond<br>Distance (Å) | $\Delta$ IE (eV) |         |
|------------------------|------------------|---------|
|                        | Active           | Passive |
| 3.25                   | 0.301            | 0.181   |
| 3.50                   | 0.250            | 0.160   |
| 3.75                   | 0.203            | 0.131   |
| 4.00                   | 0.165            | 0.116   |
| 4.25                   | 0.129            | 0.083   |
| 4.50                   | 0.103            | 0.069   |
| 4.75                   | 0.081            | 0.056   |

**Table S2.** DFT calculated H-Bond  $S_p$ -character distance dependence (values relative to H-bond at 10 Å).

| H-Bond<br>Distance (Å) | $\Delta S_p$ (%) |         |
|------------------------|------------------|---------|
|                        | Active           | Passive |
| 3.25                   | -12.3            | -3.6    |
| 3.50                   | -10.0            | -2.4    |
| 3.75                   | -7.7             | -1.7    |
| 4.00                   | -5.6             | -1.3    |
| 4.25                   | -4.0             | -1.0    |
| 4.50                   | -2.9             | -0.4    |
| 4.75                   | -1.9             | -0.2    |

**Table S3.** DFT calculated covalent and non-local electrostatic contributions to  $E^0$ .

| H-Bond<br>Distance<br>(Å) | $\Delta\Delta S_p$<br>(%) | $\Delta\Delta IE$<br>(eV) | Slope<br>(eV/% $S_p$ ) | Active                        | Passive                       | Active Non-                                 | Passive Non-                                |
|---------------------------|---------------------------|---------------------------|------------------------|-------------------------------|-------------------------------|---------------------------------------------|---------------------------------------------|
|                           |                           |                           |                        | Covalent <sup>a</sup><br>(eV) | Covalent <sup>b</sup><br>(eV) | Local<br>Electrostatic <sup>c</sup><br>(eV) | Local<br>Electrostatic <sup>d</sup><br>(eV) |
| 3.25                      | -8.7                      | 0.120                     | -0.014                 | 0.123                         | 0.036                         | 0.178                                       | 0.145                                       |
| 3.50                      | -7.6                      | 0.090                     | -0.012                 | 0.100                         | 0.024                         | 0.150                                       | 0.136                                       |
| 3.75                      | -6.0                      | 0.072                     | -0.012                 | 0.077                         | 0.017                         | 0.126                                       | 0.114                                       |
| 4.00                      | -4.3                      | 0.050                     | -0.012                 | 0.056                         | 0.013                         | 0.109                                       | 0.103                                       |
| 4.25                      | -3.0                      | 0.046                     | -0.015                 | 0.040                         | 0.010                         | 0.089                                       | 0.073                                       |
| 4.50                      | -2.5                      | 0.034                     | -0.013                 | 0.029                         | 0.004                         | 0.074                                       | 0.065                                       |
| 4.75                      | -1.7                      | 0.025                     | -0.015                 | 0.019                         | 0.002                         | 0.062                                       | 0.054                                       |

<sup>a</sup> Determined from: -10 mV/ %  $S_p$  x  $\Delta S_p$  (from Active Table S2).<sup>b</sup> Determined from: Slope x  $\Delta S_p$  (from Passive Table S2).<sup>c</sup> Determined from  $\Delta IE(\text{Active}) - \text{Active Covalent}$ .<sup>d</sup> Determined from  $\Delta IE(\text{Passive}) - \text{Passive Covalent}$ **Table S4.** DFT calculated dipole 1  $\Delta IE$  and  $\Delta S_p$  distance dependence.

| Distance<br>(Å) | $\Delta IE(\text{negative}$<br>orientation) | $\Delta S_p$ | $\Delta S_p$<br>Corr. | $\Delta IE$<br>Corr. | $\Delta IE(\text{positive}$<br>orientation) | $\Delta S_p$ | $\Delta S_p$<br>Corr. | $\Delta IE$<br>Corr. |
|-----------------|---------------------------------------------|--------------|-----------------------|----------------------|---------------------------------------------|--------------|-----------------------|----------------------|
| 3.0             | -0.188                                      | -3.4         | 0.034                 | -0.222               | 0.184                                       | 3.9          | -0.039                | 0.224                |
| 3.5             | -0.153                                      | -2.6         | 0.026                 | -0.179               | 0.152                                       | 2.9          | -0.029                | 0.181                |
| 4.0             | -0.125                                      | -2.0         | 0.020                 | -0.145               | 0.125                                       | 2.2          | -0.022                | 0.147                |
| 4.5             | -0.104                                      | -1.5         | 0.015                 | -0.119               | 0.104                                       | 1.7          | -0.017                | 0.121                |
| 5.0             | -0.089                                      | -1.2         | 0.012                 | -0.101               | 0.088                                       | 1.3          | -0.013                | 0.101                |

**Table S5.** DFT calculated dipole 2  $\Delta$ IE and  $\Delta$ S<sub>p</sub> distance dependence.

| Distance (Å) | $\Delta$ IE(negative orientation) | $\Delta$ S <sub>p</sub> | $\Delta$ S <sub>p</sub> Corr. | $\Delta$ IE Corr. | $\Delta$ IE(positive orientation) | $\Delta$ S <sub>p</sub> | $\Delta$ S <sub>p</sub> Corr. | $\Delta$ IE Corr. |
|--------------|-----------------------------------|-------------------------|-------------------------------|-------------------|-----------------------------------|-------------------------|-------------------------------|-------------------|
| 3.0          | -0.220                            | -2.5                    | 0.025                         | -0.245            | 0.225                             | 2.8                     | -0.028                        | 0.253             |
| 3.5          | -0.176                            | -1.5                    | 0.015                         | -0.191            | 0.179                             | 1.7                     | -0.017                        | 0.196             |
| 4.0          | -0.145                            | -1.0                    | 0.010                         | -0.155            | 0.146                             | 1.1                     | -0.011                        | 0.157             |
| 4.5          | -0.121                            | -0.6                    | 0.006                         | -0.127            | 0.121                             | 0.7                     | -0.007                        | 0.128             |
| 5.0          | -0.102                            | -0.4                    | 0.004                         | -0.106            | 0.103                             | 0.5                     | -0.005                        | 0.108             |

**Table S6.** DFT calculated dipole 3  $\Delta$ IE and  $\Delta$ S<sub>p</sub> distance dependence.

| Distance (Å) | $\Delta$ IE(negative orientation) | $\Delta$ S <sub>p</sub> | $\Delta$ S <sub>p</sub> Corr. | $\Delta$ IE Corr. | $\Delta$ IE(positive orientation) | $\Delta$ S <sub>p</sub> | $\Delta$ S <sub>p</sub> Corr. | $\Delta$ IE Corr. |
|--------------|-----------------------------------|-------------------------|-------------------------------|-------------------|-----------------------------------|-------------------------|-------------------------------|-------------------|
| 3.0          | -0.229                            | 0.1                     | -0.001                        | -0.228            | 0.236                             | 0                       | 0                             | 0.236             |
| 3.5          | -0.186                            | 0.1                     | -0.001                        | -0.185            | 0.190                             | -0.1                    | 0.001                         | 0.189             |
| 4.0          | -0.153                            | 0.2                     | -0.002                        | -0.151            | 0.155                             | -0.1                    | 0.001                         | 0.154             |
| 4.5          | -0.128                            | 0.2                     | -0.002                        | -0.126            | 0.129                             | -0.1                    | 0.001                         | 0.128             |
| 5.0          | -0.108                            | 0.2                     | -0.002                        | -0.106            | 0.108                             | -0.1                    | 0.001                         | 0.107             |

**Table S7.** DFT calculated dipole 4  $\Delta$ IE and  $\Delta$ S<sub>p</sub> distance dependence

| Distance (Å) | $\Delta$ IE(negative orientation) | $\Delta$ S <sub>p</sub> | $\Delta$ S <sub>p</sub> Corr. | $\Delta$ IE Corr. | $\Delta$ IE(positive orientation) | $\Delta$ S <sub>p</sub> | $\Delta$ S <sub>p</sub> Corr. | $\Delta$ IE Corr. |
|--------------|-----------------------------------|-------------------------|-------------------------------|-------------------|-----------------------------------|-------------------------|-------------------------------|-------------------|
| 3.0          | -0.211                            | 2.7                     | -0.027                        | -0.184            | 0.213                             | -2.6                    | 0.026                         | 0.187             |
| 3.5          | -0.176                            | 1.9                     | -0.019                        | -0.157            | 0.178                             | -1.8                    | 0.018                         | 0.160             |
| 4.0          | -0.147                            | 1.4                     | -0.014                        | -0.133            | 0.148                             | -1.3                    | 0.013                         | 0.135             |
| 4.5          | -0.124                            | 1.0                     | -0.010                        | -0.114            | 0.124                             | -0.9                    | 0.009                         | 0.115             |
| 5.0          | -0.105                            | 0.8                     | -0.008                        | -0.097            | 0.105                             | -0.7                    | 0.007                         | 0.098             |

**Table S8.** DFT calculated dipole 5  $\Delta$ IE and  $\Delta$ S<sub>p</sub> distance dependence

| Distance (Å) | $\Delta$ IE(negative orientation) | $\Delta$ S <sub>p</sub> | $\Delta$ S <sub>p</sub> Corr. | $\Delta$ IE Corr. | $\Delta$ IE(positive orientation) | $\Delta$ S <sub>p</sub> | $\Delta$ S <sub>p</sub> Corr. | $\Delta$ IE Corr. |
|--------------|-----------------------------------|-------------------------|-------------------------------|-------------------|-----------------------------------|-------------------------|-------------------------------|-------------------|
| 3.0          | -0.212                            | 3.4                     | -0.034                        | -0.178            | 0.218                             | -3.2                    | 0.032                         | 0.186             |
| 3.5          | -0.172                            | 2.6                     | -0.026                        | -0.146            | 0.174                             | -2.5                    | 0.025                         | 0.149             |
| 4.0          | -0.140                            | 2.1                     | -0.021                        | -0.119            | 0.141                             | -1.9                    | 0.019                         | 0.122             |
| 4.5          | -0.116                            | 1.6                     | -0.016                        | -0.100            | 0.116                             | -1.5                    | 0.015                         | 0.101             |
| 5.0          | -0.097                            | 1.3                     | -0.013                        | -0.084            | 0.097                             | -1.2                    | 0.012                         | 0.085             |



**Table S9.**  $S_p$ -characters for vacuum and PCM solvated small BC site models.

| H-bond orientation/distance                    | $\Delta S_p$ -character (%) |
|------------------------------------------------|-----------------------------|
| Active (10 Å)                                  | 9.2 <sup>a</sup>            |
| Active (3.5 Å)                                 | 7.0 <sup>a</sup>            |
| $\Delta$ solvation <sup>b</sup> (active)       | 2.2                         |
| Passive (10 Å)                                 | 9.4 <sup>a</sup>            |
| Passive (3.5 Å)                                | 7.2 <sup>a</sup>            |
| $\Delta$ solvation <sup>b</sup> (passive)      | 2.2                         |
| $\Delta$ (active-passive) (vacuum)             | 7.6                         |
| $\Delta$ (active-passive) ( $\epsilon = 4.0$ ) | 7.6                         |

<sup>a</sup> Value is (vacuum – PCM).

<sup>b</sup> Value is (10 – 3.5 Å)

Table S9 gives the  $S_p$ -characters for both vacuum and PCM solvated small models of the BC site with active and passive H-bonds at 10 and 3.5 Å. We note that the effects of H-bonding can be sensitive to solvation through imparting partial ionic or covalent character.<sup>1,2</sup> Solvating the T1 site with an H-bond at 10 Å results in a much more ionic  $\text{Cu}^{2+}$ -S(Et) bond (decrease in  $S_p$ -character by 9.2 and 9.4 % in active and passive orientations, respectively). This result is similar to those found elsewhere for H-bonding in general.<sup>1,2</sup> Solvating the T1 site with an active H-bond (S-F distance = 3.5 Å) decreases the  $S_p$ -character by 7.0 % ( $\Delta$  solvation (active) = 2.2 %  $S_p$ ) while for a passive H-bond at the same distance the  $S_p$ -character decreases by 7.2 % ( $\Delta$  solvation (passive) = 2.2 %  $S_p$ ). Furthermore, the difference in  $S_p$ -character between active and passive H-bonding (S-F distance = 3.5 Å) in both the gas phase and a PCM is 7.6 %. Therefore, with respect to solvation in a PCM formalism, the H-bonding considered is insensitive to solvation and is relatively ionic in nature, which is in agreement with previous studies.<sup>3-8</sup>

**Figure S7.** VBCI analysis.

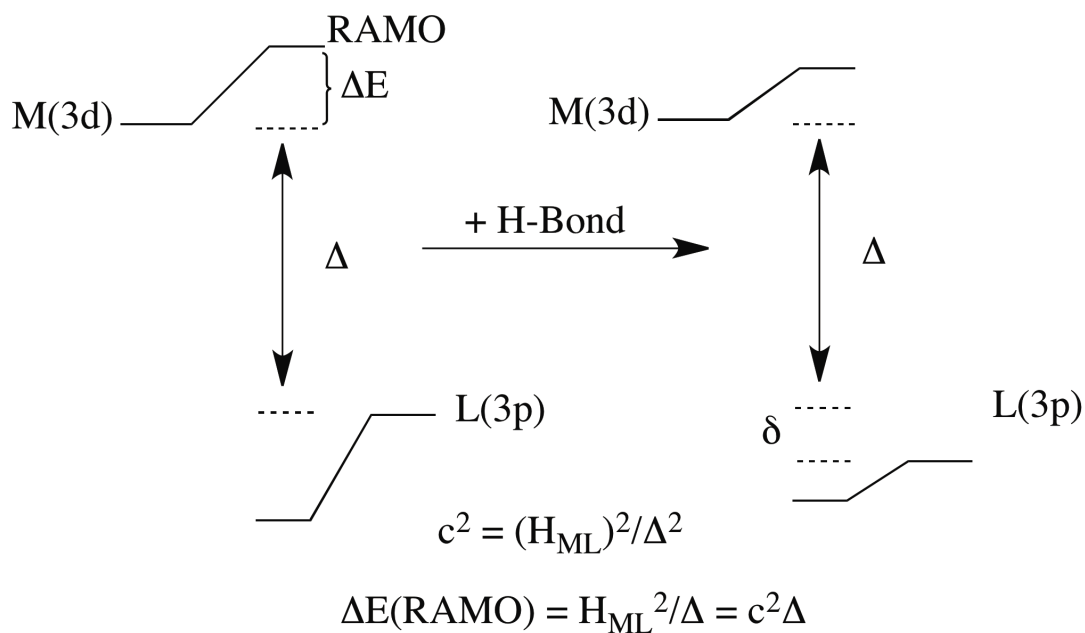

In the VBCI model, the amount of ligand character in the ground state wavefunction ( $c^2$ ) is  $(H_{ML})^2/\Delta^2$ , where  $H_{ML}$  is the resonance integral reflecting ligand-metal overlap and  $\Delta$  is the energy difference between the  $M_{3d}$  and  $L_{3p}$  orbitals before bonding. The difference in  $c^2$  upon H-bonding is then

$$c^2_L - c^2_{L'} = [(H_{ML})^2/\Delta^2] - [(H_{ML})^2/(\Delta + \delta)^2] \quad \text{eqn 1}$$

where the subscripts L and L' represent the non-H-bonded and H-bonded thiolate ligand, respectively. Simplifying this expression and substituting  $c^2_L$  for  $(H_{ML})^2/\Delta^2$  gives

$$c^2_L - c^2_{L'} = c^2_L [(\delta^2 + 2\Delta\delta)/(\Delta + \delta)^2], \quad \text{eqn 2}$$

which further simplifies to

$$c^2_L - c^2_{L'} = c^2_L [(2\delta)/(\Delta)] \quad \text{eqn 3}$$

when  $\delta < \Delta$ , which should be the case for H-bonding to a ligand-metal bond. Therefore, VBCI modeling predicts that the change in covalency due to H-bonding ( $c_L^2 - c_{L'}^2$ ) is linear in  $\delta$ .

The change in reduction potential can also be related to  $\delta$  by considering the effect of the H-bond on both oxidized and reduced bond energies (BEs) (i.e., E(RAMO) in Figure S7):

$$\Delta E_{\text{redox}} = {}^o(\text{BE}_L - \text{BE}_{L'}) - {}^r(\text{BE}_L - \text{BE}_{L'}) \quad \text{eqn 4}$$

where the superscripts o and r represent oxidized and reduced states, respectively. Substitution of  $\text{BE}_L$  with  $(H_{\text{ML}})^2/\Delta_L$ ,  $\text{BE}_{L'}$  with  $(H_{\text{ML}})^2/\Delta_{L'}$ , and  $\Delta_{L'}$  as  $(\Delta_L + \delta)$  and simplifying gives:

$$\Delta E_{\text{redox}} = ({}^o c_L^2)({}^o \Delta_L)[\delta/({}^o \Delta_L + \delta)] - ({}^r c_L^2)({}^r \Delta_L)[\delta/({}^r \Delta_L + \delta)] \quad \text{eqn 5}$$

When  $\delta < \Delta$  this expression simplifies to

$$\Delta E_{\text{redox}} = \delta({}^o c_L^2 - {}^r c_L^2). \quad \text{eqn 6}$$

Thus, VBCI modeling predicts that  $\Delta E_{\text{redox}}$  varies linearly with  $\delta$  as well.

Complete Reference 58:

Gaussian 09, Revision B.01, Frisch, M. J.; Trucks, G. W.; Schlegel, H. B.; Scuseria, G. E.; Robb, M. A.; Cheeseman, J. R.; Montgomery, Jr., J. A.; Vreven, T.; Kudin, K. N.; Burant, J. C.; Millam, J. M.; Iyengar, S. S.; Tomasi, J.; Barone, V.; Mennucci, B.; Cossi, M.; Scalmani, G.; Rega, N.; Petersson, G. A.; Nakatsuji, H.; Hada, M.; Ehara, M.; Toyota, K.; Fukuda, R.; Hasegawa, J.; Ishida, M.; Nakajima, T.; Honda, Y.; Kitao, O.; Nakai, H.; Klene, M.; Li, X.; Knox, J. E.; Hratchian, H. P.; Cross, J. B.; Bakken, V.; Adamo, C.; Jaramillo, J.; Gomperts, R.; Stratmann, R. E.; Yazyev, O.; Austin, A. J.; Cammi, R.; Pomelli, C.; Ochterski, J. W.; Ayala, P. Y.; Morokuma, K.; Voth, G. A.; Salvador, P.; Dannenberg, J. J.; Zakrzewski, V. G.; Dapprich, S.; Daniels, A. D.; Strain, M. C.; Farkas, O.; Malick, D. K.; Rabuck, A. D.; Raghavachari, K.; Foresman, J. B.; Ortiz, J. V.; Cui, Q.; Baboul, A. G.; Clifford, S.; Cioslowski, J.; Stefanov, B. B.; Liu, G.; Liashenko, A.; Piskorz, P.; Komaromi, I.; Martin, R. L.; Fox, D. J.; Keith, T.; Al-Laham, M. A.; Peng, C. Y.; Nanayakkara, A.; Challacombe, M.; Gill, P. M. W.; Johnson, B.; Chen, W.; Wong, M. W.; Gonzalez, C.; and Pople, J. A.; Gaussian, Inc., Wallingford CT, 2009.

Cartesian coordinates for the S- and L- DFT structures discussed in the manuscript:

L-WT oxidized

|   |           |           |           |
|---|-----------|-----------|-----------|
| C | 5.389355  | 0.038965  | 1.970633  |
| C | 3.88961   | 0.172803  | 1.918539  |
| O | 3.257844  | -0.176802 | 0.911132  |
| N | 3.28101   | 0.6357    | 3.040023  |
| C | 1.839186  | 0.72487   | 3.123506  |
| C | 1.40954   | 2.066406  | 3.697102  |
| O | 1.992801  | 2.560039  | 4.654361  |
| C | 1.217631  | -0.40974  | 3.975724  |
| C | 1.594363  | -1.795131 | 3.542536  |
| N | 1.459943  | -2.266578 | 2.239314  |
| C | 2.058921  | -2.819443 | 4.327822  |
| C | 1.828393  | -3.540062 | 2.251869  |
| N | 2.19784   | -3.912739 | 3.496878  |
| N | 0.310038  | 2.602457  | 3.120927  |
| C | -0.232366 | 3.858779  | 3.592559  |
| C | 0.289655  | 5.068298  | 2.80948   |
| C | -0.067436 | 5.008998  | 1.328481  |
| O | -0.751645 | 4.10801   | 0.83609   |
| N | 0.426917  | 5.996533  | 0.55905   |
| C | -6.438004 | 2.063168  | -0.098783 |
| C | -5.00135  | 2.460572  | 0.135866  |
| O | -4.691717 | 3.539268  | 0.619618  |
| N | -4.074845 | 1.512909  | -0.221558 |
| C | -2.658133 | 1.830237  | -0.263409 |
| C | -2.269579 | 2.251313  | -1.68296  |
| O | -2.696163 | 1.621905  | -2.643    |
| C | -1.930727 | 0.512807  | 0.091787  |
| S | -0.106875 | 0.660343  | 0.13671   |
| N | -1.417918 | 3.295911  | -1.79667  |
| C | -0.978316 | 3.72616   | -3.102911 |
| C | 0.393053  | 3.226741  | -3.564907 |
| O | 0.903893  | 3.662324  | -4.588459 |
| N | 0.987188  | 2.279749  | -2.798606 |
| C | 2.278586  | 1.74651   | -3.187969 |
| C | 2.809442  | 0.793237  | -2.115322 |
| C | 4.192786  | 0.27069   | -2.395966 |
| C | 4.383567  | -0.822433 | -3.23538  |
| C | 5.307773  | 0.886957  | -1.83697  |
| C | 5.661866  | -1.294358 | -3.51629  |
| C | 6.591667  | 0.420585  | -2.112322 |

|    |           |           |           |
|----|-----------|-----------|-----------|
| C  | 6.767781  | -0.668961 | -2.952785 |
| C  | -0.979194 | -2.733884 | -3.819858 |
| C  | -0.402506 | -2.185557 | -2.511478 |
| C  | 0.944076  | -2.743751 | -2.153152 |
| N  | 1.605644  | -2.404422 | -0.974565 |
| C  | 1.765911  | -3.572042 | -2.875619 |
| C  | 2.795356  | -2.989682 | -1.007204 |
| N  | 2.921712  | -3.722115 | -2.132331 |
| C  | -5.292697 | -3.284932 | -0.435507 |
| C  | -6.220443 | -2.108901 | -0.636267 |
| O  | -5.794397 | -1.000893 | -0.964133 |
| C  | -4.008981 | -2.875625 | 0.265087  |
| C  | -2.98216  | -3.996779 | 0.229093  |
| S  | -1.397849 | -3.502691 | 0.970648  |
| C  | -1.870471 | -3.447396 | 2.73729   |
| N  | -7.532522 | -2.377664 | -0.459991 |
| C  | -8.548912 | -1.37302  | -0.673394 |
| Cu | 0.965094  | -1.216134 | 0.530461  |
| H  | 3.575332  | -2.86271  | -0.272385 |
| H  | 3.757796  | -4.208959 | -2.424066 |
| H  | 1.632509  | -4.055913 | -3.82993  |
| H  | -1.099649 | -2.37407  | -1.685806 |
| H  | -0.319886 | -1.09245  | -2.584441 |
| H  | -1.948459 | -2.270817 | -4.024846 |
| H  | -1.122631 | -3.819979 | -3.775063 |
| H  | 3.518067  | -1.297906 | -3.692251 |
| H  | 5.79771   | -2.137198 | -4.190334 |
| H  | 7.769123  | -1.028535 | -3.175276 |
| H  | 7.454913  | 0.919116  | -1.678562 |
| H  | 5.171721  | 1.749124  | -1.187853 |
| H  | 2.810318  | 1.306723  | -1.148014 |
| H  | 2.114477  | -0.046689 | -2.018033 |
| H  | 2.979162  | 2.575806  | -3.347386 |
| H  | 0.550569  | 1.979571  | -1.937101 |
| H  | -0.957923 | 4.820051  | -3.159536 |
| H  | -1.710321 | 3.37699   | -3.83619  |
| H  | -1.129308 | 3.777052  | -0.946463 |
| H  | -2.463954 | 2.614672  | 0.467016  |
| H  | -2.279821 | 0.143236  | 1.060002  |
| H  | -2.179826 | -0.237219 | -0.665993 |
| H  | -4.394673 | 0.743769  | -0.802487 |
| H  | -6.87605  | 2.76653   | -0.815995 |
| H  | -6.55411  | 1.045359  | -0.471156 |

|   |           |           |           |
|---|-----------|-----------|-----------|
| H | -6.991366 | 2.183496  | 0.838883  |
| H | -8.302361 | -0.782026 | -1.558755 |
| H | -9.513482 | -1.862312 | -0.828559 |
| H | -8.633749 | -0.691223 | 0.181273  |
| H | -7.810101 | -3.304446 | -0.173949 |
| H | -5.054014 | -3.678342 | -1.434788 |
| H | -5.792146 | -4.099673 | 0.104996  |
| H | -4.229562 | -2.587459 | 1.299868  |
| H | -3.608821 | -1.987867 | -0.230284 |
| H | -3.341298 | -4.90465  | 0.727947  |
| H | -2.746019 | -4.271559 | -0.805478 |
| H | -2.603839 | -2.662304 | 2.936541  |
| H | -0.964439 | -3.231118 | 3.307375  |
| H | -2.267461 | -4.414673 | 3.058467  |
| H | 1.818697  | -4.205499 | 1.402607  |
| H | 2.50622   | -4.835748 | 3.770526  |
| H | 2.289374  | -2.862341 | 5.381208  |
| H | 0.126234  | -0.291686 | 3.939902  |
| H | 1.514243  | -0.272601 | 5.021403  |
| H | 1.472702  | 0.637137  | 2.106692  |
| H | 3.815909  | 1.026414  | 3.806385  |
| H | 5.857933  | 0.722421  | 2.685864  |
| H | 5.645272  | -0.985771 | 2.266448  |
| H | 5.798398  | 0.210306  | 0.972878  |
| H | -0.011404 | 2.267078  | 2.21994   |
| H | 0.041671  | 3.963434  | 4.643386  |
| H | 1.379336  | 5.141037  | 2.915892  |
| H | -0.130811 | 5.989171  | 3.235648  |
| H | 0.931599  | 6.781051  | 0.946771  |
| H | 0.165211  | 6.044673  | -0.416325 |
| H | -1.322914 | 3.814912  | 3.517385  |
| H | -0.32415  | -2.511225 | -4.66949  |
| H | 2.194481  | 1.23387   | -4.155308 |

**L-WT reduced**

|   |          |           |          |
|---|----------|-----------|----------|
| C | 5.385547 | 0.1543    | 1.942845 |
| C | 3.880291 | 0.27614   | 1.885204 |
| O | 3.25203  | -0.11773  | 0.900472 |
| N | 3.275622 | 0.77979   | 2.992681 |
| C | 1.832835 | 0.83477   | 3.091095 |
| C | 1.385498 | 2.187904  | 3.620725 |
| O | 1.97212  | 2.717318  | 4.564722 |
| C | 1.264476 | -0.267189 | 4.022865 |

|   |           |           |           |
|---|-----------|-----------|-----------|
| C | 1.685183  | -1.657782 | 3.655563  |
| N | 1.504964  | -2.193191 | 2.38686   |
| C | 2.253722  | -2.609954 | 4.465643  |
| C | 1.948954  | -3.435103 | 2.438566  |
| N | 2.413062  | -3.735552 | 3.679777  |
| N | 0.283324  | 2.694311  | 3.030945  |
| C | -0.272404 | 3.957866  | 3.47446   |
| C | 0.234868  | 5.14666   | 2.651926  |
| C | -0.127483 | 5.030577  | 1.174853  |
| O | -0.806565 | 4.117166  | 0.714173  |
| N | 0.349065  | 6.009594  | 0.374296  |
| C | -6.473166 | 1.980595  | -0.131245 |
| C | -5.034871 | 2.399136  | 0.076117  |
| O | -4.740773 | 3.497549  | 0.533702  |
| N | -4.110004 | 1.46424   | -0.270449 |
| C | -2.691632 | 1.785547  | -0.306569 |
| C | -2.312924 | 2.16392   | -1.736678 |
| O | -2.73769  | 1.504446  | -2.678522 |
| C | -1.917914 | 0.524465  | 0.125569  |
| S | -0.101534 | 0.775548  | 0.162357  |
| N | -1.498618 | 3.235204  | -1.895756 |
| C | -1.046088 | 3.613025  | -3.210288 |
| C | 0.331297  | 3.107486  | -3.65733  |
| O | 0.830209  | 3.525293  | -4.702084 |
| N | 0.938905  | 2.199249  | -2.862767 |
| C | 2.232873  | 1.668685  | -3.25052  |
| C | 2.779303  | 0.754579  | -2.151915 |
| C | 4.1673    | 0.239416  | -2.423078 |
| C | 4.366912  | -0.876528 | -3.229772 |
| C | 5.277591  | 0.884995  | -1.888345 |
| C | 5.649292  | -1.342291 | -3.502244 |
| C | 6.565525  | 0.425013  | -2.155457 |
| C | 6.750426  | -0.687553 | -2.963238 |
| C | -0.97611  | -2.865447 | -3.730544 |
| C | -0.376028 | -2.341022 | -2.425686 |
| C | 0.987048  | -2.883475 | -2.11376  |
| N | 1.655948  | -2.530588 | -0.947732 |
| C | 1.798487  | -3.709009 | -2.854005 |
| C | 2.840852  | -3.110946 | -0.997476 |
| N | 2.967605  | -3.85259  | -2.126316 |
| C | -5.268162 | -3.361975 | -0.310669 |
| C | -6.206471 | -2.205178 | -0.5543   |
| O | -5.7983   | -1.100912 | -0.906097 |

|    |           |           |           |
|----|-----------|-----------|-----------|
| C  | -3.970713 | -2.905277 | 0.335515  |
| C  | -2.976048 | -4.050074 | 0.454263  |
| S  | -1.364957 | -3.492734 | 1.08304   |
| C  | -1.840757 | -3.004988 | 2.778268  |
| N  | -7.522445 | -2.490276 | -0.385019 |
| C  | -8.547073 | -1.49516  | -0.591173 |
| Cu | 0.971057  | -1.203657 | 0.52737   |
| H  | 3.628438  | -2.986473 | -0.269289 |
| H  | 3.804385  | -4.328178 | -2.429997 |
| H  | 1.654626  | -4.197067 | -3.805067 |
| H  | -1.043222 | -2.564586 | -1.585043 |
| H  | -0.317121 | -1.245266 | -2.45509  |
| H  | -1.958387 | -2.415174 | -3.902898 |
| H  | -1.099808 | -3.955892 | -3.711075 |
| H  | 3.50291   | -1.383009 | -3.654153 |
| H  | 5.790876  | -2.209098 | -4.144733 |
| H  | 7.755409  | -1.044848 | -3.176231 |
| H  | 7.425219  | 0.943039  | -1.736322 |
| H  | 5.131673  | 1.760288  | -1.259704 |
| H  | 2.777394  | 1.297418  | -1.202193 |
| H  | 2.092822  | -0.084822 | -2.00913  |
| H  | 2.921231  | 2.5023    | -3.441172 |
| H  | 0.487752  | 1.84367   | -2.017647 |
| H  | -1.028528 | 4.704814  | -3.312288 |
| H  | -1.773428 | 3.23159   | -3.932521 |
| H  | -1.155179 | 3.698178  | -1.057635 |
| H  | -2.518727 | 2.607679  | 0.384847  |
| H  | -2.284411 | 0.223537  | 1.112338  |
| H  | -2.158135 | -0.278268 | -0.580411 |
| H  | -4.415322 | 0.657394  | -0.803195 |
| H  | -6.915973 | 2.627676  | -0.897817 |
| H  | -6.579918 | 0.938846  | -0.433464 |
| H  | -7.028685 | 2.160868  | 0.795666  |
| H  | -8.250725 | -0.843282 | -1.41538  |
| H  | -9.49029  | -1.987065 | -0.845719 |
| H  | -8.703714 | -0.870428 | 0.297665  |
| H  | -7.782611 | -3.397459 | -0.029013 |
| H  | -5.049657 | -3.817221 | -1.288251 |
| H  | -5.753393 | -4.143629 | 0.29039   |
| H  | -4.183807 | -2.48063  | 1.323493  |
| H  | -3.541401 | -2.097308 | -0.261792 |
| H  | -3.362685 | -4.862418 | 1.08318   |
| H  | -2.764451 | -4.478761 | -0.532808 |



|   |           |           |           |
|---|-----------|-----------|-----------|
| H | -2.441284 | -2.091956 | 2.782307  |
| H | -0.913366 | -2.812391 | 3.319178  |
| H | -2.384836 | -3.81266  | 3.278491  |
| H | 1.938192  | -4.137187 | 1.6181    |
| H | 2.789618  | -4.624123 | 3.976192  |
| H | 2.544672  | -2.587722 | 5.504877  |
| H | 0.169906  | -0.188559 | 3.987481  |
| H | 1.568511  | -0.05947  | 5.055678  |
| H | 1.431837  | 0.674057  | 2.092113  |
| H | 3.808973  | 1.201852  | 3.741977  |
| H | 5.851505  | 0.873692  | 2.625331  |
| H | 5.64866   | -0.854035 | 2.285263  |
| H | 5.79215   | 0.282831  | 0.937705  |
| H | -0.04207  | 2.279929  | 2.149947  |
| H | 0.007791  | 4.096168  | 4.520318  |
| H | 1.325198  | 5.224391  | 2.750481  |
| H | -0.187905 | 6.081472  | 3.045704  |
| H | 0.936055  | 6.754718  | 0.718423  |
| H | 0.152331  | 5.976497  | -0.616218 |
| H | -1.362921 | 3.902132  | 3.401904  |
| H | -0.345375 | -2.613914 | -4.59165  |
| H | 2.14956   | 1.125794  | -4.202887 |

**L-F114P oxidized**

|   |           |           |           |
|---|-----------|-----------|-----------|
| C | -6.575463 | -0.81205  | -0.496376 |
| C | -5.077283 | -0.58296  | -0.615992 |
| O | -4.311819 | -0.680508 | 0.350323  |
| N | -4.620529 | -0.318314 | -1.869761 |
| C | -3.211398 | -0.123478 | -2.135589 |
| C | -3.056385 | 1.113621  | -3.064994 |
| O | -3.954557 | 1.445105  | -3.839033 |
| C | -2.588739 | -1.364418 | -2.837449 |
| C | -2.758044 | -2.647667 | -2.083688 |
| N | -2.108398 | -2.922948 | -0.884232 |
| C | -3.536467 | -3.729086 | -2.4086   |
| C | -2.487599 | -4.134735 | -0.505159 |
| N | -3.352691 | -4.656609 | -1.40235  |
| N | -1.855914 | 1.731925  | -2.979071 |
| C | -1.473236 | 2.871563  | -3.799889 |
| C | -1.792087 | 4.216885  | -3.143603 |
| C | -1.068064 | 4.449916  | -1.821287 |
| O | -0.080667 | 3.784424  | -1.493899 |
| N | -1.60348  | 5.433015  | -1.028996 |

|    |           |           |           |
|----|-----------|-----------|-----------|
| C  | 5.832086  | 2.213899  | -1.744461 |
| C  | 4.337852  | 2.492278  | -1.721299 |
| O  | 3.811158  | 3.375575  | -2.386853 |
| N  | 3.656332  | 1.646731  | -0.877838 |
| C  | 2.229628  | 1.712481  | -0.59335  |
| C  | 2.062342  | 2.205321  | 0.843833  |
| O  | 2.626251  | 1.590399  | 1.741283  |
| C  | 1.685492  | 0.287284  | -0.748366 |
| S  | -0.128644 | 0.213063  | -0.593993 |
| N  | 1.340322  | 3.330404  | 1.049497  |
| C  | 1.301677  | 3.942778  | 2.364072  |
| C  | 0.215161  | 3.531893  | 3.39053   |
| O  | 0.36396   | 3.870346  | 4.562224  |
| N  | -0.853844 | 2.770018  | 2.995494  |
| C  | -1.753865 | 2.24928   | 4.03809   |
| C  | -2.910354 | 1.622152  | 3.253689  |
| C  | -2.978134 | 2.48265   | 1.984753  |
| C  | -1.496403 | 2.748541  | 1.671563  |
| C  | 1.752513  | -1.944587 | 4.125104  |
| C  | 0.84632   | -1.430853 | 3.008387  |
| C  | -0.600688 | -1.784921 | 3.184293  |
| N  | -1.448482 | -1.927023 | 2.092329  |
| C  | -1.345413 | -1.960905 | 4.323025  |
| C  | -2.672008 | -2.153079 | 2.555913  |
| N  | -2.644273 | -2.189914 | 3.904712  |
| C  | 5.232391  | -3.011118 | -0.171283 |
| C  | 6.05495   | -1.762182 | -0.49248  |
| O  | 5.603887  | -0.613966 | -0.43185  |
| C  | 3.748085  | -2.683081 | -0.178634 |
| C  | 2.877758  | -3.887058 | 0.150528  |
| S  | 1.11858   | -3.61167  | -0.261713 |
| C  | 1.19275   | -3.696252 | -2.084908 |
| N  | 7.334007  | -2.016126 | -0.846723 |
| C  | 8.243053  | -0.945163 | -1.188556 |
| Cu | -0.907761 | -1.662949 | 0.186038  |
| H  | 8.086536  | -0.587617 | -2.21379  |
| H  | 9.272208  | -1.300167 | -1.094634 |
| H  | 8.090985  | -0.106001 | -0.506789 |
| H  | 7.644621  | -2.972969 | -0.931154 |
| H  | 5.464574  | -3.802397 | -0.896384 |
| H  | 5.542966  | -3.389155 | 0.813256  |
| H  | 3.488147  | -2.284603 | -1.164559 |
| H  | 3.558488  | -1.878426 | 0.536594  |

|   |           |           |           |
|---|-----------|-----------|-----------|
| H | 3.197078  | -4.787675 | -0.386837 |
| H | 2.901136  | -4.124104 | 1.219263  |
| H | 0.165373  | -3.627432 | -2.447757 |
| H | 1.616755  | -4.652827 | -2.402215 |
| H | 1.773727  | -2.873625 | -2.509711 |
| H | 6.03558   | 1.153953  | -1.901507 |
| H | 6.282564  | 2.492226  | -0.784133 |
| H | 6.285054  | 2.815862  | -2.534315 |
| H | 4.20059   | 0.982327  | -0.336543 |
| H | 1.782615  | 2.390799  | -1.321786 |
| H | 2.136934  | -0.360704 | 0.002306  |
| H | 1.945507  | -0.086745 | -1.743718 |
| H | 0.88845   | 3.758219  | 0.244612  |
| H | 1.244423  | 5.03143   | 2.247501  |
| H | 2.244478  | 3.724076  | 2.870183  |
| H | -1.079873 | 1.950667  | 1.046012  |
| H | -1.351962 | 3.691526  | 1.139627  |
| H | -3.494504 | 1.981613  | 1.160999  |
| H | -3.495212 | 3.427353  | 2.193093  |
| H | -3.844382 | 1.619228  | 3.823746  |
| H | -2.674931 | 0.587841  | 2.982214  |
| H | -2.091936 | 3.069983  | 4.683138  |
| H | 1.709921  | -3.036692 | 4.209421  |
| H | 2.789401  | -1.651289 | 3.934793  |
| H | 0.953465  | -0.34084  | 2.921193  |
| H | 1.181512  | -1.83509  | 2.046285  |
| H | -1.076353 | -1.940642 | 5.367099  |
| H | -3.445644 | -2.325594 | 4.505093  |
| H | -3.568387 | -2.205713 | 1.955213  |
| H | -6.757028 | -1.880141 | -0.332672 |
| H | -6.95406  | -0.275791 | 0.37786   |
| H | -7.132073 | -0.497863 | -1.383802 |
| H | -5.248932 | -0.025857 | -2.610246 |
| H | -2.72565  | 0.049961  | -1.176743 |
| H | -1.52442  | -1.168528 | -3.010057 |
| H | -3.058108 | -1.471285 | -3.821771 |
| H | -4.185623 | -3.91338  | -3.25052  |
| H | -3.772436 | -5.574868 | -1.353    |
| H | -2.151365 | -4.651183 | 0.381313  |
| H | -1.214387 | 1.458579  | -2.24039  |
| H | -2.012318 | 2.801434  | -4.747037 |
| H | -1.499763 | 5.025371  | -3.829244 |
| H | -2.875145 | 4.308952  | -2.996427 |

|   |           |          |           |
|---|-----------|----------|-----------|
| H | -1.053393 | 5.78054  | -0.254343 |
| H | -2.314625 | 6.051684 | -1.393908 |
| H | 1.475025  | -1.52143 | 5.097342  |
| H | -1.218371 | 1.539587 | 4.676919  |
| H | -0.400757 | 2.799856 | -3.998793 |

**L-F114P** reduced

|   |           |           |           |
|---|-----------|-----------|-----------|
| C | -6.57597  | -0.70039  | -0.461122 |
| C | -5.071131 | -0.487606 | -0.585487 |
| O | -4.306965 | -0.605003 | 0.376018  |
| N | -4.62155  | -0.220793 | -1.837363 |
| C | -3.206941 | -0.078509 | -2.116716 |
| C | -3.0288   | 1.151009  | -3.04739  |
| O | -3.92923  | 1.49534   | -3.824274 |
| C | -2.643607 | -1.33657  | -2.838118 |
| C | -2.890642 | -2.621319 | -2.109523 |
| N | -2.249105 | -2.942691 | -0.920558 |
| C | -3.732353 | -3.651075 | -2.450522 |
| C | -2.692282 | -4.1322   | -0.560018 |
| N | -3.595965 | -4.60392  | -1.458122 |
| N | -1.826052 | 1.749105  | -2.95313  |
| C | -1.420801 | 2.866638  | -3.786083 |
| C | -1.715506 | 4.23164   | -3.149922 |
| C | -0.981109 | 4.452356  | -1.829891 |
| O | -0.005326 | 3.77642   | -1.505063 |
| N | -1.496989 | 5.453645  | -1.04159  |
| C | 5.8778    | 2.100828  | -1.771906 |
| C | 4.386598  | 2.410937  | -1.728897 |
| O | 3.875064  | 3.295076  | -2.411542 |
| N | 3.70732   | 1.606492  | -0.866438 |
| C | 2.271743  | 1.668103  | -0.604308 |
| C | 2.112286  | 2.16278   | 0.829607  |
| O | 2.675567  | 1.549429  | 1.729266  |
| C | 1.699683  | 0.255411  | -0.767899 |
| S | -0.124137 | 0.221757  | -0.698546 |
| N | 1.426812  | 3.314732  | 1.035217  |
| C | 1.39514   | 3.927533  | 2.346659  |
| C | 0.299278  | 3.540054  | 3.375714  |
| O | 0.465165  | 3.881411  | 4.548805  |
| N | -0.7865   | 2.81128   | 2.99385   |
| C | -1.68297  | 2.29561   | 4.040374  |
| C | -2.812287 | 1.621292  | 3.255454  |
| C | -2.897024 | 2.459055  | 1.972592  |

|    |           |           |           |
|----|-----------|-----------|-----------|
| C  | -1.422021 | 2.760161  | 1.658533  |
| C  | 1.749345  | -1.958977 | 4.132461  |
| C  | 0.825314  | -1.414165 | 3.044885  |
| C  | -0.623793 | -1.735977 | 3.258733  |
| N  | -1.476343 | -1.915619 | 2.179906  |
| C  | -1.353895 | -1.847913 | 4.417024  |
| C  | -2.690319 | -2.107193 | 2.667745  |
| N  | -2.660893 | -2.083168 | 4.02439   |
| C  | 5.192549  | -3.105763 | -0.172792 |
| C  | 6.032781  | -1.870958 | -0.495003 |
| O  | 5.605141  | -0.716713 | -0.445648 |
| C  | 3.710996  | -2.769883 | -0.189982 |
| C  | 2.834157  | -3.989309 | 0.050239  |
| S  | 1.068471  | -3.634111 | -0.244243 |
| C  | 1.089688  | -3.420315 | -2.056771 |
| N  | 7.317883  | -2.148349 | -0.836666 |
| C  | 8.234993  | -1.097734 | -1.21128  |
| Cu | -0.961268 | -1.686401 | 0.192365  |
| H  | 8.124244  | -0.805795 | -2.264032 |
| H  | 9.263209  | -1.432365 | -1.046249 |
| H  | 8.040928  | -0.218434 | -0.594655 |
| H  | 7.598265  | -3.111192 | -0.950148 |
| H  | 5.424036  | -3.901772 | -0.894544 |
| H  | 5.496374  | -3.485173 | 0.813786  |
| H  | 3.469296  | -2.316513 | -1.15581  |
| H  | 3.501963  | -2.003804 | 0.561181  |
| H  | 3.128967  | -4.833102 | -0.587096 |
| H  | 2.899366  | -4.330478 | 1.089625  |
| H  | 0.047574  | -3.408229 | -2.378122 |
| H  | 1.605277  | -4.258011 | -2.537569 |
| H  | 1.549862  | -2.472171 | -2.343548 |
| H  | 6.050731  | 1.052923  | -2.025995 |
| H  | 6.336466  | 2.273796  | -0.791192 |
| H  | 6.349167  | 2.753856  | -2.5093   |
| H  | 4.230706  | 0.910428  | -0.347224 |
| H  | 1.838683  | 2.355048  | -1.331028 |
| H  | 2.1069    | -0.369429 | 0.029555  |
| H  | 2.053401  | -0.137519 | -1.727322 |
| H  | 0.936893  | 3.716129  | 0.240356  |
| H  | 1.360493  | 5.018392  | 2.232212  |
| H  | 2.330936  | 3.685414  | 2.855167  |
| H  | -0.981051 | 1.975558  | 1.038732  |
| H  | -1.308471 | 3.714327  | 1.136728  |

|   |           |           |           |
|---|-----------|-----------|-----------|
| H | -3.389445 | 1.923214  | 1.156609  |
| H | -3.448518 | 3.389757  | 2.162175  |
| H | -3.75124  | 1.594039  | 3.818877  |
| H | -2.536738 | 0.594573  | 2.999031  |
| H | -2.050503 | 3.121877  | 4.664327  |
| H | 1.682493  | -3.051425 | 4.20806   |
| H | 2.788992  | -1.690184 | 3.917718  |
| H | 0.957388  | -0.327751 | 2.955662  |
| H | 1.113083  | -1.81739  | 2.06867   |
| H | -1.074543 | -1.777365 | 5.456584  |
| H | -3.459262 | -2.169323 | 4.635668  |
| H | -3.592895 | -2.184652 | 2.079299  |
| H | -6.77183  | -1.773631 | -0.357004 |
| H | -6.936414 | -0.206948 | 0.445403  |
| H | -7.136379 | -0.32913  | -1.324879 |
| H | -5.243963 | 0.08383   | -2.576895 |
| H | -2.690486 | 0.06161   | -1.169432 |
| H | -1.566398 | -1.187585 | -2.966261 |
| H | -3.100632 | -1.398246 | -3.833225 |
| H | -4.3948   | -3.787509 | -3.2916   |
| H | -4.062032 | -5.498552 | -1.419652 |
| H | -2.382729 | -4.676415 | 0.320308  |
| H | -1.146713 | 1.37632   | -2.270835 |
| H | -1.952982 | 2.801072  | -4.738945 |
| H | -1.407607 | 5.027719  | -3.84362  |
| H | -2.796524 | 4.341996  | -2.999547 |
| H | -0.966747 | 5.763927  | -0.239073 |
| H | -2.224505 | 6.062612  | -1.385872 |
| H | 1.508071  | -1.541802 | 5.118016  |
| H | -1.136899 | 1.61285   | 4.699255  |
| H | -0.34709  | 2.775936  | -3.971603 |

**L-F114N oxidized**

|   |           |           |           |
|---|-----------|-----------|-----------|
| C | -5.864615 | -0.260753 | -0.984357 |
| C | -4.381184 | -0.082097 | -1.168003 |
| O | -3.592144 | -0.352403 | -0.249569 |
| N | -3.962964 | 0.333511  | -2.390335 |
| C | -2.555099 | 0.464489  | -2.694447 |
| C | -2.267879 | 1.78364   | -3.394865 |
| O | -3.005298 | 2.2046    | -4.276943 |
| C | -2.023997 | -0.696719 | -3.571751 |
| C | -2.277415 | -2.06663  | -3.016555 |
| N | -1.934712 | -2.459855 | -1.725519 |

|    |           |           |           |
|----|-----------|-----------|-----------|
| C  | -2.81174  | -3.147793 | -3.670151 |
| C  | -2.250401 | -3.743006 | -1.617808 |
| N  | -2.783671 | -4.196462 | -2.773148 |
| N  | -1.114446 | 2.383069  | -3.020766 |
| C  | -0.69757  | 3.627277  | -3.632041 |
| C  | -1.14421  | 4.862039  | -2.841569 |
| C  | -0.567595 | 4.898062  | -1.430821 |
| O  | 0.217633  | 4.047626  | -1.002288 |
| N  | -0.977338 | 5.912762  | -0.647897 |
| C  | 6.053475  | 2.229776  | -0.833728 |
| C  | 4.584067  | 2.57008   | -0.869884 |
| O  | 4.164608  | 3.609998  | -1.354937 |
| N  | 3.757682  | 1.616628  | -0.327408 |
| C  | 2.352196  | 1.893746  | -0.087804 |
| C  | 2.164344  | 2.383205  | 1.350434  |
| O  | 2.75303   | 1.821751  | 2.266225  |
| C  | 1.630488  | 0.536987  | -0.255203 |
| S  | -0.184927 | 0.628857  | -0.042002 |
| N  | 1.297926  | 3.405358  | 1.538053  |
| C  | 1.044315  | 3.896424  | 2.871554  |
| C  | -0.21825  | 3.379327  | 3.564457  |
| O  | -0.591156 | 3.860637  | 4.625862  |
| N  | -0.873856 | 2.358767  | 2.95584   |
| C  | -2.085664 | 1.828374  | 3.549829  |
| C  | -2.692876 | 0.765867  | 2.630644  |
| C  | -4.042746 | 0.283528  | 3.122259  |
| C  | 1.398031  | -2.50973  | 3.911864  |
| C  | 0.608322  | -2.052871 | 2.68122   |
| C  | -0.768675 | -2.642238 | 2.577185  |
| N  | -1.602017 | -2.407294 | 1.48477   |
| C  | -1.458029 | -3.417999 | 3.475629  |
| C  | -2.759377 | -3.004021 | 1.736412  |
| N  | -2.704834 | -3.642909 | 2.921937  |
| C  | 5.175613  | -3.122488 | -0.052755 |
| C  | 6.078143  | -1.910654 | -0.051126 |
| O  | 5.663354  | -0.79821  | 0.275613  |
| C  | 3.773187  | -2.776204 | -0.520229 |
| C  | 2.817711  | -3.940865 | -0.314619 |
| S  | 1.125597  | -3.535776 | -0.840851 |
| C  | 1.350195  | -3.505847 | -2.655847 |
| N  | 7.361059  | -2.151592 | -0.399598 |
| C  | 8.355714  | -1.103765 | -0.408638 |
| Cu | -1.231982 | -1.300017 | -0.170921 |

|   |           |           |           |
|---|-----------|-----------|-----------|
| H | -3.640097 | -2.946848 | 1.115303  |
| H | -3.475289 | -4.124062 | 3.364415  |
| H | -1.171892 | -3.831382 | 4.429706  |
| H | 1.163796  | -2.29373  | 1.766727  |
| H | 0.524134  | -0.95748  | 2.694115  |
| H | 2.38048   | -2.029749 | 3.924942  |
| H | 1.54828   | -3.595651 | 3.915868  |
| H | -2.862415 | 1.178644  | 1.634399  |
| H | -2.003668 | -0.077428 | 2.534362  |
| H | -2.802058 | 2.642303  | 3.716474  |
| H | -0.57856  | 2.042016  | 2.041489  |
| H | 0.98491   | 4.990194  | 2.872818  |
| H | 1.89351   | 3.617007  | 3.501245  |
| H | 0.871647  | 3.833302  | 0.717146  |
| H | 2.021608  | 2.627684  | -0.821363 |
| H | 1.850569  | 0.115634  | -1.239771 |
| H | 2.015156  | -0.153535 | 0.502173  |
| H | 4.189264  | 0.891351  | 0.23755   |
| H | 6.557339  | 2.945524  | -0.173794 |
| H | 6.25309   | 1.216449  | -0.485362 |
| H | 6.470711  | 2.374297  | -1.835588 |
| H | 8.186224  | -0.434653 | 0.437663  |
| H | 9.350525  | -1.547074 | -0.318789 |
| H | 8.316802  | -0.509751 | -1.329942 |
| H | 7.623805  | -3.079897 | -0.695134 |
| H | 5.136672  | -3.498391 | 0.980538  |
| H | 5.601381  | -3.933066 | -0.658678 |
| H | 3.800896  | -2.482966 | -1.576481 |
| H | 3.423479  | -1.904287 | 0.037577  |
| H | 3.146106  | -4.845376 | -0.840017 |
| H | 2.740727  | -4.197311 | 0.748234  |
| H | 2.007016  | -2.691254 | -2.970323 |
| H | 0.364645  | -3.35057  | -3.099391 |
| H | 1.750057  | -4.460703 | -3.008755 |
| H | -2.089262 | -4.359009 | -0.746828 |
| H | -3.094174 | -5.142088 | -2.950007 |
| H | -3.192565 | -3.257251 | -4.673913 |
| H | -0.945308 | -0.542948 | -3.709769 |
| H | -2.480124 | -0.628212 | -4.565482 |
| H | -2.036822 | 0.447304  | -1.742361 |
| H | -4.621294 | 0.664886  | -3.085046 |
| H | -6.461696 | 0.254118  | -1.742799 |
| H | -6.101255 | -1.330398 | -1.027456 |



|   |           |           |           |
|---|-----------|-----------|-----------|
| H | -6.137703 | 0.102075  | 0.010749  |
| H | -0.655004 | 2.111127  | -2.159144 |
| H | -1.130456 | 3.66382   | -4.632804 |
| H | -2.239485 | 4.893784  | -2.784998 |
| H | -0.829394 | 5.770254  | -3.37291  |
| H | -1.57493  | 6.651813  | -0.990214 |
| H | -0.581625 | 6.020658  | 0.27603   |
| H | 0.392759  | 3.621615  | -3.721273 |
| H | 0.887626  | -2.233185 | 4.841272  |
| H | -1.856586 | 1.413924  | 4.540658  |
| O | -5.106398 | 0.739279  | 2.766891  |
| N | -4.059732 | -0.749384 | 4.006993  |
| H | -4.943531 | -0.872369 | 4.486363  |
| H | -3.232866 | -0.967251 | 4.549923  |

**L-F114N reduced**

|   |           |           |           |
|---|-----------|-----------|-----------|
| C | -5.858685 | -0.147586 | -0.967627 |
| C | -4.368118 | 0.018762  | -1.145268 |
| O | -3.585297 | -0.293976 | -0.244638 |
| N | -3.952382 | 0.470567  | -2.357593 |
| C | -2.544171 | 0.565762  | -2.673035 |
| C | -2.232086 | 1.89632   | -3.338806 |
| O | -2.971864 | 2.351221  | -4.210622 |
| C | -2.074164 | -0.575005 | -3.613379 |
| C | -2.382853 | -1.952797 | -3.110498 |
| N | -1.998468 | -2.407906 | -1.855515 |
| C | -3.02865  | -2.966846 | -3.773955 |
| C | -2.399076 | -3.663059 | -1.773557 |
| N | -3.029255 | -4.048467 | -2.913813 |
| N | -1.073668 | 2.468903  | -2.950969 |
| C | -0.638919 | 3.720139  | -3.540586 |
| C | -1.06574  | 4.939278  | -2.716931 |
| C | -0.485076 | 4.922436  | -1.30676  |
| O | 0.292747  | 4.060997  | -0.905116 |
| N | -0.870397 | 5.935962  | -0.500295 |
| C | 6.098825  | 2.145407  | -0.805044 |
| C | 4.631213  | 2.510783  | -0.811396 |
| O | 4.230744  | 3.568369  | -1.284569 |
| N | 3.804006  | 1.570649  | -0.280495 |
| C | 2.39536   | 1.85109   | -0.052375 |
| C | 2.218449  | 2.303597  | 1.395427  |
| O | 2.803697  | 1.7149    | 2.297523  |
| C | 1.613098  | 0.544411  | -0.291957 |

|    |           |           |           |
|----|-----------|-----------|-----------|
| S  | -0.196981 | 0.736252  | -0.062652 |
| N  | 1.393653  | 3.355919  | 1.61601   |
| C  | 1.131219  | 3.801466  | 2.96044   |
| C  | -0.141516 | 3.28237   | 3.639255  |
| O  | -0.498101 | 3.749115  | 4.720047  |
| N  | -0.821155 | 2.30373   | 3.001447  |
| C  | -2.029456 | 1.768296  | 3.600761  |
| C  | -2.656534 | 0.735763  | 2.654247  |
| C  | -4.009491 | 0.261637  | 3.137938  |
| C  | 1.384516  | -2.633161 | 3.842244  |
| C  | 0.556787  | -2.164292 | 2.644352  |
| C  | -0.820158 | -2.756269 | 2.577473  |
| N  | -1.656188 | -2.521838 | 1.492195  |
| C  | -1.492194 | -3.532388 | 3.491573  |
| C  | -2.800081 | -3.12603  | 1.754832  |
| N  | -2.744585 | -3.767279 | 2.94858   |
| C  | 5.1369    | -3.209504 | -0.151656 |
| C  | 6.056767  | -2.013749 | -0.113974 |
| O  | 5.663607  | -0.902173 | 0.231474  |
| C  | 3.740771  | -2.829389 | -0.614885 |
| C  | 2.786822  | -4.011545 | -0.536145 |
| S  | 1.077801  | -3.537777 | -0.932992 |
| C  | 1.284698  | -3.071157 | -2.687845 |
| N  | 7.34344   | -2.271009 | -0.460225 |
| C  | 8.348083  | -1.234359 | -0.471096 |
| Cu | -1.239961 | -1.289348 | -0.172627 |
| H  | -3.684423 | -3.084278 | 1.136442  |
| H  | -3.50596  | -4.258442 | 3.392909  |
| H  | -1.196124 | -3.943896 | 4.44387   |
| H  | 1.076973  | -2.393792 | 1.707258  |
| H  | 0.471328  | -1.069827 | 2.65573   |
| H  | 2.367452  | -2.152638 | 3.83333   |
| H  | 1.535167  | -3.720112 | 3.83039   |
| H  | -2.817797 | 1.177179  | 1.670034  |
| H  | -1.976386 | -0.108638 | 2.517736  |
| H  | -2.734277 | 2.585763  | 3.797554  |
| H  | -0.496369 | 1.924519  | 2.109893  |
| H  | 1.084796  | 4.896283  | 3.001302  |
| H  | 1.974027  | 3.488869  | 3.58347   |
| H  | 0.915783  | 3.761245  | 0.814145  |
| H  | 2.093978  | 2.624997  | -0.755378 |
| H  | 1.837915  | 0.198022  | -1.305936 |
| H  | 1.989157  | -0.206822 | 0.411491  |

|   |           |           |           |
|---|-----------|-----------|-----------|
| H | 4.213779  | 0.805052  | 0.24279   |
| H | 6.651038  | 2.942378  | -0.294984 |
| H | 6.304557  | 1.188144  | -0.325716 |
| H | 6.461103  | 2.121136  | -1.839659 |
| H | 8.220674  | -0.593599 | 0.404579  |
| H | 9.340825  | -1.691136 | -0.436679 |
| H | 8.279963  | -0.6028   | -1.36582  |
| H | 7.58292   | -3.191032 | -0.796926 |
| H | 5.086953  | -3.616306 | 0.869492  |
| H | 5.554911  | -4.008227 | -0.780056 |
| H | 3.789382  | -2.447888 | -1.641245 |
| H | 3.370476  | -2.007608 | 0.002849  |
| H | 3.106228  | -4.835942 | -1.186641 |
| H | 2.74427   | -4.404623 | 0.486742  |
| H | 1.811367  | -2.119083 | -2.791147 |
| H | 0.283705  | -2.962285 | -3.106994 |
| H | 1.817129  | -3.854937 | -3.236433 |
| H | -2.241085 | -4.316046 | -0.928135 |
| H | -3.413015 | -4.962918 | -3.102648 |
| H | -3.469434 | -3.013897 | -4.758116 |
| H | -0.990156 | -0.461347 | -3.746215 |
| H | -2.533921 | -0.441586 | -4.599907 |
| H | -1.99483  | 0.481653  | -1.737292 |
| H | -4.607441 | 0.829985  | -3.039782 |
| H | -6.450972 | 0.413877  | -1.697765 |
| H | -6.110951 | -1.210313 | -1.064676 |
| H | -6.122447 | 0.169403  | 0.045279  |
| H | -0.60795  | 2.119428  | -2.106464 |
| H | -1.076646 | 3.786825  | -4.538315 |
| H | -2.160825 | 4.976764  | -2.65526  |
| H | -0.743029 | 5.861895  | -3.219057 |
| H | -1.562825 | 6.615185  | -0.779004 |
| H | -0.549884 | 5.951494  | 0.457832  |
| H | 0.451646  | 3.70238   | -3.629743 |
| H | 0.902673  | -2.371487 | 4.792251  |
| H | -1.796356 | 1.32267   | 4.578391  |
| O | -5.070392 | 0.747734  | 2.80382   |
| N | -4.043494 | -0.787634 | 4.002821  |
| H | -4.925575 | -0.934764 | 4.474375  |
| H | -3.206632 | -1.106319 | 4.473337  |

**L-N47S oxidized**

|   |         |          |          |
|---|---------|----------|----------|
| C | 5.38726 | -1.20778 | 1.724815 |
|---|---------|----------|----------|

|   |           |           |           |
|---|-----------|-----------|-----------|
| C | 3.887511  | -1.079975 | 1.780546  |
| O | 3.258147  | -0.597274 | 0.826707  |
| N | 3.275233  | -1.570824 | 2.887433  |
| C | 1.832908  | -1.567334 | 3.005669  |
| C | 1.401232  | -1.046727 | 4.369621  |
| O | 1.977619  | -1.396771 | 5.389978  |
| C | 1.213195  | -2.96818  | 2.778137  |
| C | 1.587632  | -3.612225 | 1.476545  |
| N | 1.449961  | -2.998017 | 0.233553  |
| C | 2.058426  | -4.885106 | 1.278186  |
| C | 1.8224    | -3.886062 | -0.678464 |
| N | 2.197431  | -5.040224 | -0.086234 |
| N | 0.30504   | -0.255347 | 4.349688  |
| C | -0.250575 | 0.265834  | 5.580805  |
| C | -6.444124 | 1.670456  | 1.704318  |
| C | -5.012131 | 1.775879  | 2.160945  |
| O | -4.704232 | 2.179362  | 3.272208  |
| N | -4.078422 | 1.375783  | 1.235811  |
| C | -2.663196 | 1.632722  | 1.436087  |
| C | -2.281588 | 2.945971  | 0.757176  |
| O | -2.696866 | 3.202148  | -0.364766 |
| C | -1.928031 | 0.462653  | 0.747902  |
| S | -0.109494 | 0.525856  | 0.928681  |
| N | -1.42386  | 3.753335  | 1.433805  |
| C | -0.985878 | 4.995474  | 0.838107  |
| C | 0.387944  | 4.983342  | 0.159976  |
| O | 0.898802  | 6.023838  | -0.231514 |
| N | 0.976376  | 3.772595  | -0.001266 |
| C | 2.278226  | 3.688048  | -0.63496  |
| C | 2.810867  | 2.254913  | -0.57559  |
| C | 4.1965    | 2.096507  | -1.141617 |
| C | 4.392472  | 1.943125  | -2.510558 |
| C | 5.30842   | 2.12291   | -0.305917 |
| C | 5.67288   | 1.819881  | -3.040689 |
| C | 6.594394  | 1.999522  | -0.828174 |
| C | 6.775688  | 1.849355  | -2.195319 |
| C | -0.962509 | 1.030727  | -4.312273 |
| C | -0.399123 | 0.45453   | -3.009336 |
| C | 0.953962  | -0.180151 | -3.15131  |
| N | 1.615285  | -0.783594 | -2.082528 |
| C | 1.783365  | -0.230987 | -4.243183 |
| C | 2.811995  | -1.155947 | -2.517736 |
| N | 2.942551  | -0.8575   | -3.825672 |

|    |           |           |           |
|----|-----------|-----------|-----------|
| C  | -5.279142 | -1.795241 | -2.377233 |
| C  | -6.211011 | -0.836423 | -1.673561 |
| O  | -5.788224 | 0.1692    | -1.100599 |
| C  | -3.982519 | -1.983556 | -1.609811 |
| C  | -2.962235 | -2.758014 | -2.429158 |
| S  | -1.385678 | -2.953706 | -1.54451  |
| C  | -1.869648 | -4.203896 | -0.299432 |
| N  | -7.521798 | -1.150406 | -1.749949 |
| C  | -8.541825 | -0.302188 | -1.176971 |
| Cu | 0.964555  | -1.044631 | -0.188988 |
| H  | 3.593324  | -1.584921 | -1.909545 |
| H  | 3.783803  | -0.978373 | -4.372632 |
| H  | 1.653387  | 0.116464  | -5.25562  |
| H  | -1.098051 | -0.281162 | -2.592198 |
| H  | -0.331039 | 1.256937  | -2.261966 |
| H  | -1.938516 | 1.488317  | -4.128076 |
| H  | -1.088878 | 0.25493   | -5.076562 |
| H  | 3.529621  | 1.942436  | -3.173655 |
| H  | 5.812844  | 1.72194   | -4.11493  |
| H  | 7.778618  | 1.762234  | -2.605112 |
| H  | 7.454964  | 2.0348    | -0.164965 |
| H  | 5.168687  | 2.25353   | 0.764823  |
| H  | 2.807912  | 1.913705  | 0.465361  |
| H  | 2.11862   | 1.601329  | -1.116437 |
| H  | 2.970364  | 4.37721   | -0.13509  |
| H  | 0.554889  | 2.945021  | 0.397833  |
| H  | -0.968566 | 5.789724  | 1.590188  |
| H  | -1.71909  | 5.277788  | 0.078135  |
| H  | -1.21603  | 3.560275  | 2.403342  |
| H  | -2.483267 | 1.652628  | 2.514311  |
| H  | -2.291197 | -0.486184 | 1.151823  |
| H  | -2.161689 | 0.48661   | -0.320518 |
| H  | -4.394074 | 1.231758  | 0.280833  |
| H  | -6.862017 | 2.682352  | 1.648817  |
| H  | -6.553112 | 1.182051  | 0.735905  |
| H  | -7.016773 | 1.132858  | 2.466912  |
| H  | -8.273719 | 0.745635  | -1.329914 |
| H  | -9.497017 | -0.501639 | -1.668669 |
| H  | -8.658376 | -0.474094 | -0.099988 |
| H  | -7.796786 | -2.000763 | -2.218375 |
| H  | -5.060642 | -1.365107 | -3.365976 |
| H  | -5.768181 | -2.760516 | -2.562691 |
| H  | -4.186624 | -2.49751  | -0.662879 |

|   |           |           |           |
|---|-----------|-----------|-----------|
| H | -3.582361 | -0.99991  | -1.352676 |
| H | -3.329506 | -3.74858  | -2.721948 |
| H | -2.717658 | -2.221475 | -3.353011 |
| H | -2.641421 | -3.825562 | 0.37497   |
| H | -0.977703 | -4.435229 | 0.286412  |
| H | -2.220569 | -5.116904 | -0.788482 |
| H | 1.807724  | -3.73366  | -1.746391 |
| H | 2.509688  | -5.874937 | -0.563603 |
| H | 2.293503  | -5.674301 | 1.975666  |
| H | 0.121648  | -2.864163 | 2.843594  |
| H | 1.514252  | -3.628021 | 3.599114  |
| H | 1.470737  | -0.897617 | 2.234766  |
| H | 3.806072  | -1.833086 | 3.709803  |
| H | 5.853177  | -1.235604 | 2.71492   |
| H | 5.645739  | -2.138612 | 1.205203  |
| H | 5.796682  | -0.376856 | 1.146841  |
| H | -0.004903 | 0.125883  | 3.464361  |
| H | -0.108102 | -0.472762 | 6.371148  |
| H | -1.319485 | 0.455871  | 5.450327  |
| H | -0.308028 | 1.808757  | -4.720472 |
| H | 2.207643  | 4.033263  | -1.674598 |
| H | 0.241131  | 1.196166  | 5.891655  |

#### L-N7S reduced

|   |           |           |           |
|---|-----------|-----------|-----------|
| C | 5.387061  | -1.249045 | 1.663384  |
| C | 3.88257   | -1.124674 | 1.721583  |
| O | 3.254603  | -0.614198 | 0.790441  |
| N | 3.276814  | -1.660529 | 2.812347  |
| C | 1.834184  | -1.688019 | 2.923401  |
| C | 1.396584  | -1.220068 | 4.304816  |
| O | 1.975814  | -1.620768 | 5.313041  |
| C | 1.256985  | -3.107288 | 2.687959  |
| C | 1.649818  | -3.717904 | 1.377468  |
| N | 1.463147  | -3.076755 | 0.159336  |
| C | 2.194121  | -4.9579   | 1.150283  |
| C | 1.88159   | -3.914104 | -0.772381 |
| N | 2.332871  | -5.070024 | -0.220024 |
| N | 0.306111  | -0.428468 | 4.317598  |
| C | -0.263703 | 0.016936  | 5.573821  |
| C | -6.463457 | 1.547921  | 1.755535  |
| C | -5.026277 | 1.651937  | 2.209278  |
| O | -4.728306 | 1.999535  | 3.346065  |
| N | -4.100461 | 1.317039  | 1.268653  |

|    |           |           |           |
|----|-----------|-----------|-----------|
| C  | -2.682145 | 1.547295  | 1.490078  |
| C  | -2.301501 | 2.884377  | 0.866315  |
| O  | -2.724952 | 3.193602  | -0.240571 |
| C  | -1.903109 | 0.407844  | 0.815843  |
| S  | -0.096658 | 0.559508  | 1.065468  |
| N  | -1.484426 | 3.692603  | 1.591641  |
| C  | -1.027077 | 4.944126  | 1.041336  |
| C  | 0.349361  | 4.961808  | 0.362485  |
| O  | 0.851483  | 6.030834  | 0.019712  |
| N  | 0.949064  | 3.767584  | 0.163433  |
| C  | 2.246965  | 3.724194  | -0.483811 |
| C  | 2.789217  | 2.293438  | -0.486483 |
| C  | 4.176345  | 2.169197  | -1.057359 |
| C  | 4.374453  | 2.077056  | -2.431474 |
| C  | 5.287386  | 2.166539  | -0.220078 |
| C  | 5.656092  | 1.98567   | -2.96507  |
| C  | 6.574585  | 2.074703  | -0.745807 |
| C  | 6.757993  | 1.985598  | -2.118004 |
| C  | -0.97279  | 1.208308  | -4.277206 |
| C  | -0.383903 | 0.560777  | -3.023459 |
| C  | 0.973245  | -0.044155 | -3.226587 |
| N  | 1.629088  | -0.710793 | -2.199112 |
| C  | 1.791678  | -0.021376 | -4.330095 |
| C  | 2.814128  | -1.059302 | -2.666402 |
| N  | 2.951946  | -0.679653 | -3.961212 |
| C  | -5.271815 | -1.72835  | -2.472152 |
| C  | -6.206949 | -0.803081 | -1.732289 |
| O  | -5.795174 | 0.175012  | -1.111528 |
| C  | -3.970025 | -1.932376 | -1.715789 |
| C  | -2.97821  | -2.755897 | -2.523526 |
| S  | -1.371296 | -2.895932 | -1.686513 |
| C  | -1.85658  | -3.916609 | -0.250402 |
| N  | -7.521722 | -1.118521 | -1.831146 |
| C  | -8.545469 | -0.311049 | -1.211442 |
| Cu | 0.950689  | -1.020774 | -0.238143 |
| H  | 3.593339  | -1.541369 | -2.095173 |
| H  | 3.791949  | -0.763023 | -4.514582 |
| H  | 1.65849   | 0.391077  | -5.317796 |
| H  | -1.060715 | -0.212849 | -2.641547 |
| H  | -0.318496 | 1.303576  | -2.217561 |
| H  | -1.95328  | 1.640788  | -4.055706 |
| H  | -1.097166 | 0.480302  | -5.089016 |
| H  | 3.510094  | 2.083684  | -3.091919 |

|   |           |           |           |
|---|-----------|-----------|-----------|
| H | 5.796569  | 1.927239  | -4.042601 |
| H | 7.762407  | 1.919032  | -2.529947 |
| H | 7.434666  | 2.080877  | -0.080096 |
| H | 5.142905  | 2.241834  | 0.855084  |
| H | 2.786492  | 1.907375  | 0.537359  |
| H | 2.101283  | 1.650266  | -1.042955 |
| H | 2.933763  | 4.399843  | 0.042141  |
| H | 0.503584  | 2.891572  | 0.438639  |
| H | -1.005218 | 5.714962  | 1.818959  |
| H | -1.759893 | 5.25357   | 0.291883  |
| H | -1.104496 | 3.353308  | 2.46363   |
| H | -2.521007 | 1.547585  | 2.570518  |
| H | -2.273243 | -0.541512 | 1.215056  |
| H | -2.125785 | 0.433042  | -0.256053 |
| H | -4.406118 | 1.199685  | 0.308806  |
| H | -6.919444 | 2.54243   | 1.823473  |
| H | -6.570686 | 1.167115  | 0.739788  |
| H | -7.006971 | 0.902335  | 2.454579  |
| H | -8.288892 | 0.745798  | -1.315864 |
| H | -9.503195 | -0.496604 | -1.705171 |
| H | -8.652013 | -0.530517 | -0.141626 |
| H | -7.786774 | -1.958911 | -2.321729 |
| H | -5.060303 | -1.26671  | -3.448297 |
| H | -5.756919 | -2.690893 | -2.685955 |
| H | -4.178959 | -2.419283 | -0.756291 |
| H | -3.538796 | -0.956433 | -1.479756 |
| H | -3.367985 | -3.756125 | -2.752286 |
| H | -2.762529 | -2.267018 | -3.481245 |
| H | -2.503471 | -3.364574 | 0.435955  |
| H | -0.935582 | -4.173992 | 0.274032  |
| H | -2.354108 | -4.836183 | -0.57472  |
| H | 1.859649  | -3.728585 | -1.835836 |
| H | 2.693051  | -5.868647 | -0.721814 |
| H | 2.482782  | -5.749435 | 1.824995  |
| H | 0.163377  | -3.027925 | 2.748869  |
| H | 1.575658  | -3.765766 | 3.504512  |
| H | 1.436881  | -1.026451 | 2.158024  |
| H | 3.807528  | -1.950442 | 3.624181  |
| H | 5.853353  | -1.316891 | 2.652447  |
| H | 5.647691  | -2.156894 | 1.105416  |
| H | 5.795718  | -0.394094 | 1.120889  |
| H | -0.005213 | -0.026429 | 3.427472  |
| H | -0.298959 | -0.819113 | 6.277114  |



|   |           |          |           |
|---|-----------|----------|-----------|
| H | -1.277421 | 0.385922 | 5.396575  |
| H | -0.333759 | 2.019013 | -4.647151 |
| H | 2.170382  | 4.113312 | -1.509062 |
| H | 0.330184  | 0.817679 | 6.033713  |

**S-WT oxidized**

|    |           |           |           |
|----|-----------|-----------|-----------|
| C  | -1.113056 | -2.473021 | 3.554109  |
| C  | -0.269213 | -1.581558 | 2.680974  |
| O  | -0.632123 | -1.280951 | 1.539137  |
| N  | 0.914515  | -1.16177  | 3.18274   |
| C  | 1.964543  | -0.643688 | 2.295059  |
| C  | 2.273632  | 0.850693  | 2.533776  |
| C  | 1.059419  | 1.696979  | 2.748532  |
| N  | 0.015658  | 1.755505  | 1.834976  |
| C  | 0.748433  | 2.5016    | 3.814698  |
| C  | -0.89524  | 2.577604  | 2.337062  |
| N  | -0.490129 | 3.047521  | 3.535696  |
| C  | 5.320208  | -3.146734 | 0.197589  |
| C  | 4.595907  | -3.239521 | -1.137483 |
| O  | 4.162552  | -2.240433 | -1.706124 |
| N  | 4.465846  | -4.462268 | -1.644904 |
| C  | 3.13533   | 0.400283  | -3.440222 |
| C  | 2.231341  | 1.053017  | -2.397939 |
| S  | 1.434635  | -0.201204 | -1.295567 |
| C  | -2.767432 | -2.921215 | -0.642892 |
| C  | -4.00442  | -2.375872 | -0.972122 |
| C  | -2.715355 | -3.933404 | 0.310114  |
| C  | -5.171072 | -2.830377 | -0.365475 |
| C  | -3.878716 | -4.394277 | 0.923214  |
| C  | -5.105835 | -3.843251 | 0.584018  |
| C  | -2.43442  | 2.148579  | -4.105638 |
| C  | -1.641793 | 1.750903  | -2.859049 |
| C  | -2.494539 | 1.367819  | -1.687001 |
| N  | -1.943734 | 0.924849  | -0.489352 |
| C  | -3.860268 | 1.323534  | -1.566604 |
| C  | -2.947538 | 0.599092  | 0.313921  |
| N  | -4.123688 | 0.849352  | -0.294505 |
| C  | 0.319982  | 5.240313  | -1.707398 |
| S  | 0.382448  | 4.028591  | -0.351326 |
| C  | 1.800537  | 4.708448  | 0.579826  |
| Cu | -0.017197 | 0.76059   | 0.056151  |
| H  | -2.842275 | 0.142692  | 1.285546  |
| H  | -5.032226 | 0.597939  | 0.06974   |

|   |           |           |           |
|---|-----------|-----------|-----------|
| H | -4.647959 | 1.581407  | -2.256272 |
| H | -0.972766 | 2.569862  | -2.56438  |
| H | -0.988637 | 0.900328  | -3.094897 |
| H | -1.754217 | 2.406758  | -4.922575 |
| H | -3.073727 | 3.018958  | -3.91687  |
| H | -4.061523 | -1.613888 | -1.746012 |
| H | -6.135027 | -2.415956 | -0.652994 |
| H | -6.016169 | -4.212811 | 1.049501  |
| H | -3.826347 | -5.196884 | 1.654559  |
| H | -1.758467 | -4.384606 | 0.560728  |
| H | 0.563493  | -2.071041 | -2.751518 |
| H | 3.890376  | -0.235838 | -2.973062 |
| H | 2.790459  | 1.740957  | -1.756244 |
| H | 1.428735  | 1.632626  | -2.86391  |
| H | 0.138491  | 6.246918  | -1.321483 |
| H | -0.512564 | 4.962717  | -2.359158 |
| H | 2.719715  | 4.65651   | -0.010396 |
| H | 1.918943  | 4.106037  | 1.483573  |
| H | 1.607067  | 5.745089  | 0.86917   |
| H | -1.819814 | 2.863409  | 1.860681  |
| H | -0.995407 | 3.70708   | 4.111326  |
| H | 1.284227  | 2.723581  | 4.724598  |
| H | 2.861522  | 1.221406  | 1.684236  |
| H | 2.917092  | 0.952499  | 3.414706  |
| H | 1.637839  | -0.850237 | 1.284955  |
| H | 1.199356  | -1.524982 | 4.082329  |
| H | -0.780855 | -2.506458 | 4.596445  |
| H | -2.155186 | -2.145831 | 3.517574  |
| H | -1.085327 | -3.48848  | 3.144448  |
| H | 3.459284  | -0.888359 | 0.311535  |
| H | 4.63148   | -3.330155 | 1.021888  |
| H | 6.113501  | -3.904949 | 0.252464  |
| H | 4.859039  | -5.280678 | -1.205628 |
| H | 3.983123  | -4.576507 | -2.526379 |
| H | -3.070446 | 1.326929  | -4.4526   |
| H | 1.243634  | 5.231445  | -2.294105 |
| H | 2.8432    | -1.220098 | 2.525542  |
| H | -1.868772 | -2.613584 | -1.170301 |
| H | 5.763333  | -2.163373 | 0.307279  |
| H | 2.554902  | -0.222055 | -4.129739 |
| H | 3.636136  | 1.179967  | -4.027045 |
| F | 0.046975  | -2.697466 | -3.211961 |
| F | 3.926673  | -1.244821 | 1.036579  |

**S-WT reduced**

|    |           |           |           |
|----|-----------|-----------|-----------|
| C  | -1.012289 | -2.559728 | 3.525427  |
| C  | -0.204949 | -1.623395 | 2.652811  |
| O  | -0.581434 | -1.327196 | 1.523511  |
| N  | 0.972477  | -1.175523 | 3.157228  |
| C  | 2.014654  | -0.656991 | 2.252445  |
| C  | 2.373431  | 0.8158    | 2.537135  |
| C  | 1.180259  | 1.674497  | 2.818358  |
| N  | 0.100076  | 1.741781  | 1.952671  |
| C  | 0.927366  | 2.464887  | 3.912055  |
| C  | -0.779425 | 2.55161   | 2.51072   |
| N  | -0.3249   | 3.014422  | 3.703522  |
| C  | 5.38187   | -3.067078 | 0.066479  |
| C  | 4.639839  | -3.150994 | -1.259412 |
| O  | 4.181096  | -2.150597 | -1.805385 |
| N  | 4.523429  | -4.367502 | -1.784824 |
| C  | 3.126982  | 0.626206  | -3.4513   |
| C  | 2.186981  | 1.177631  | -2.379658 |
| S  | 1.444986  | -0.161627 | -1.342814 |
| C  | -2.719872 | -2.969134 | -0.654191 |
| C  | -3.970738 | -2.440217 | -0.956703 |
| C  | -2.636468 | -3.995459 | 0.281308  |
| C  | -5.120408 | -2.924698 | -0.340902 |
| C  | -3.782644 | -4.48635  | 0.903409  |
| C  | -5.023887 | -3.951423 | 0.590885  |
| C  | -2.52477  | 2.160741  | -4.038069 |
| C  | -1.785234 | 1.778372  | -2.754514 |
| C  | -2.679561 | 1.402833  | -1.611055 |
| N  | -2.146647 | 1.002473  | -0.393431 |
| C  | -4.04991  | 1.33717   | -1.537691 |
| C  | -3.165411 | 0.688451  | 0.383415  |
| N  | -4.343778 | 0.893267  | -0.258823 |
| C  | 0.210793  | 5.261059  | -1.629369 |
| S  | 0.262511  | 4.049076  | -0.273605 |
| C  | 2.000519  | 4.273711  | 0.229361  |
| Cu | -0.097169 | 0.76897   | 0.068569  |
| H  | -3.086987 | 0.278823  | 1.379313  |
| H  | -5.257166 | 0.643244  | 0.090032  |
| H  | -4.823307 | 1.561988  | -2.255378 |
| H  | -1.133126 | 2.6007    | -2.435627 |
| H  | -1.107647 | 0.935111  | -2.939959 |

|   |           |           |           |
|---|-----------|-----------|-----------|
| H | -1.811599 | 2.414799  | -4.828824 |
| H | -3.178674 | 3.029033  | -3.886198 |
| H | -4.046974 | -1.649208 | -1.698725 |
| H | -6.094209 | -2.513124 | -0.599306 |
| H | -5.920698 | -4.340437 | 1.068477  |
| H | -3.704689 | -5.294444 | 1.6273    |
| H | -1.665478 | -4.420565 | 0.522004  |
| H | 0.564761  | -2.027196 | -2.796176 |
| H | 3.910656  | 0.010079  | -3.003105 |
| H | 2.736973  | 1.862095  | -1.723112 |
| H | 1.381133  | 1.759442  | -2.841795 |
| H | 0.435906  | 6.273663  | -1.278562 |
| H | -0.805364 | 5.251706  | -2.033987 |
| H | 2.678189  | 3.984797  | -0.579539 |
| H | 2.172311  | 3.619105  | 1.08568   |
| H | 2.195113  | 5.309049  | 0.526739  |
| H | -1.728332 | 2.836685  | 2.082068  |
| H | -0.796014 | 3.67601   | 4.30272   |
| H | 1.506591  | 2.6749    | 4.798355  |
| H | 2.92688   | 1.192975  | 1.668557  |
| H | 3.054073  | 0.879651  | 3.395576  |
| H | 1.645626  | -0.783903 | 1.24068   |
| H | 1.272198  | -1.551323 | 4.046703  |
| H | -0.829098 | -2.418053 | 4.597059  |
| H | -2.074949 | -2.42463  | 3.314729  |
| H | -0.755951 | -3.594838 | 3.270166  |
| H | 3.484235  | -0.843622 | 0.243967  |
| H | 4.702811  | -3.269824 | 0.894358  |
| H | 6.189554  | -3.813544 | 0.098766  |
| H | 4.785957  | -5.19917  | -1.277663 |
| H | 3.9231    | -4.47542  | -2.591966 |
| H | -3.144085 | 1.3336    | -4.405209 |
| H | 0.90638   | 4.988369  | -2.429671 |
| H | 2.87622   | -1.276706 | 2.429109  |
| H | -1.83183  | -2.620902 | -1.174107 |
| H | 5.801471  | -2.075506 | 0.189729  |
| H | 2.579745  | -0.006659 | -4.15946  |
| H | 3.593713  | 1.445716  | -4.017344 |
| F | 0.052422  | -2.655044 | -3.25934  |
| F | 3.968232  | -1.203497 | 0.956316  |

**S-F114P oxidized**

|   |          |          |          |
|---|----------|----------|----------|
| C | 0.770949 | 3.042014 | 3.109158 |
|---|----------|----------|----------|

|    |           |           |           |
|----|-----------|-----------|-----------|
| C  | 0.017411  | 1.99405   | 2.332582  |
| O  | 0.429247  | 1.59001   | 1.241709  |
| N  | -1.142208 | 1.548145  | 2.866905  |
| C  | -2.118424 | 0.824077  | 2.043531  |
| C  | -2.264212 | -0.660174 | 2.449584  |
| C  | -0.975351 | -1.332817 | 2.805716  |
| N  | 0.104835  | -1.423149 | 1.938218  |
| C  | -0.631459 | -1.93688  | 3.988726  |
| C  | 1.067997  | -2.066854 | 2.581744  |
| N  | 0.661495  | -2.394599 | 3.827614  |
| C  | -5.632625 | 2.774059  | -0.35919  |
| C  | -4.89396  | 2.774678  | -1.689609 |
| O  | -4.367835 | 1.757683  | -2.134847 |
| N  | -4.857502 | 3.937775  | -2.334106 |
| C  | -3.173096 | -1.226955 | -3.268999 |
| C  | -2.134228 | -1.633663 | -2.225927 |
| S  | -1.461295 | -0.169363 | -1.329168 |
| C  | 2.459657  | 3.14565   | -1.096812 |
| C  | 3.743934  | 2.673869  | -1.349768 |
| C  | 2.305155  | 4.252277  | -0.26798  |
| C  | 4.856871  | 3.29298   | -0.789637 |
| C  | 3.414159  | 4.878148  | 0.297794  |
| C  | 4.689265  | 4.398758  | 0.035511  |
| C  | 2.617495  | -2.297608 | -3.951693 |
| C  | 1.836985  | -1.776046 | -2.741914 |
| C  | 2.691369  | -1.246231 | -1.627578 |
| N  | 2.134836  | -0.744189 | -0.454541 |
| C  | 4.053914  | -1.106891 | -1.545666 |
| C  | 3.131353  | -0.296102 | 0.294629  |
| N  | 4.31098   | -0.515929 | -0.32188  |
| C  | 0.088003  | -5.317908 | -1.235709 |
| S  | 0.147069  | -4.009853 | 0.025689  |
| C  | -1.37278  | -4.447146 | 0.941094  |
| Cu | 0.173839  | -0.692486 | 0.029166  |
| H  | 3.022339  | 0.216548  | 1.237858  |
| H  | 5.212942  | -0.204655 | 0.010678  |
| H  | 4.843579  | -1.372487 | -2.230351 |
| H  | 1.189575  | -2.567299 | -2.3432   |
| H  | 1.159229  | -0.972804 | -3.060999 |
| H  | 1.928281  | -2.660416 | -4.719804 |
| H  | 3.279397  | -3.127357 | -3.67747  |
| H  | 3.879409  | 1.824596  | -2.015814 |
| H  | 5.856646  | 2.928136  | -1.0145   |

|   |           |           |           |
|---|-----------|-----------|-----------|
| H | 5.556219  | 4.892902  | 0.466993  |
| H | 3.280219  | 5.74936   | 0.933969  |
| H | 1.308199  | 4.637254  | -0.067919 |
| H | -3.971618 | -0.624554 | -2.828075 |
| H | -2.569892 | -2.296185 | -1.468967 |
| H | -1.296131 | -2.17485  | -2.676011 |
| H | 0.103418  | -6.308438 | -0.77256  |
| H | 0.978489  | -5.214366 | -1.861677 |
| H | -2.257306 | -4.345515 | 0.305066  |
| H | -1.453068 | -3.758154 | 1.783629  |
| H | -1.311368 | -5.470245 | 1.322321  |
| H | 2.03395   | -2.32476  | 2.176247  |
| H | 1.204797  | -2.904348 | 4.510686  |
| H | -1.181751 | -2.075268 | 4.906559  |
| H | -2.767756 | -1.193637 | 1.633534  |
| H | -2.929003 | -0.734002 | 3.317477  |
| H | -1.796806 | 0.945613  | 1.018098  |
| H | -1.474887 | 1.992355  | 3.711756  |
| H | 0.391322  | 3.193335  | 4.124471  |
| H | 1.829508  | 2.773078  | 3.157575  |
| H | 0.710048  | 3.991434  | 2.566762  |
| H | -3.591278 | 0.711008  | 0.031965  |
| H | -4.975888 | 3.101797  | 0.44604   |
| H | -6.483959 | 3.468241  | -0.39714  |
| H | -5.339985 | 4.760031  | -2.004919 |
| H | -4.386182 | 3.984126  | -3.227505 |
| H | 3.230321  | -1.509383 | -4.403104 |
| H | -0.800639 | -5.221038 | -1.866777 |
| H | -3.057404 | 1.322972  | 2.205436  |
| H | 1.593672  | 2.661268  | -1.536635 |
| H | -6.000219 | 1.777192  | -0.144046 |
| H | -2.716278 | -0.629863 | -4.064554 |
| H | -3.609657 | -2.124804 | -3.723386 |
| F | -4.100318 | 1.107014  | 0.706697  |

**S-F114P reduced**

|   |           |           |          |
|---|-----------|-----------|----------|
| C | 0.903272  | 2.999089  | 3.126489 |
| C | 0.120385  | 1.974796  | 2.334869 |
| O | 0.518557  | 1.575632  | 1.245478 |
| N | -1.059085 | 1.565068  | 2.86331  |
| C | -2.07677  | 0.934954  | 2.003112 |
| C | -2.402661 | -0.513514 | 2.424172 |
| C | -1.205377 | -1.301136 | 2.858372 |

|    |           |           |           |
|----|-----------|-----------|-----------|
| N  | -0.076242 | -1.433025 | 2.064513  |
| C  | -1.004016 | -1.978404 | 4.036126  |
| C  | 0.778719  | -2.172506 | 2.744491  |
| N  | 0.263286  | -2.526867 | 3.950547  |
| C  | -5.450023 | 3.071648  | -0.442456 |
| C  | -4.691315 | 3.041803  | -1.761209 |
| O  | -4.210024 | 2.001866  | -2.204172 |
| N  | -4.586224 | 4.20484   | -2.398235 |
| C  | -3.123436 | -1.062678 | -3.413348 |
| C  | -2.165854 | -1.493299 | -2.300939 |
| S  | -1.443389 | -0.034319 | -1.424524 |
| C  | 2.661358  | 3.038854  | -1.052052 |
| C  | 3.924124  | 2.504265  | -1.287782 |
| C  | 2.549614  | 4.147642  | -0.21925  |
| C  | 5.05779   | 3.063677  | -0.706806 |
| C  | 3.679604  | 4.713974  | 0.367347  |
| C  | 4.932977  | 4.172296  | 0.122104  |
| C  | 2.590387  | -2.390896 | -3.935989 |
| C  | 1.842463  | -1.911763 | -2.687518 |
| C  | 2.728343  | -1.424978 | -1.578939 |
| N  | 2.191106  | -0.938636 | -0.393595 |
| C  | 4.097825  | -1.329678 | -1.516192 |
| C  | 3.206966  | -0.54905  | 0.351735  |
| N  | 4.387724  | -0.780919 | -0.277712 |
| C  | -0.130428 | -5.293673 | -1.277387 |
| S  | -0.102969 | -4.020606 | 0.027526  |
| C  | -1.81427  | -4.220117 | 0.625646  |
| Cu | 0.135825  | -0.71211  | 0.077138  |
| H  | 3.125962  | -0.069412 | 1.315927  |
| H  | 5.299548  | -0.50279  | 0.053278  |
| H  | 4.873178  | -1.600879 | -2.215646 |
| H  | 1.206001  | -2.71536  | -2.297883 |
| H  | 1.146125  | -1.102009 | -2.941258 |
| H  | 1.881423  | -2.721673 | -4.701731 |
| H  | 3.257305  | -3.23298  | -3.711095 |
| H  | 4.021864  | 1.637472  | -1.936983 |
| H  | 6.040228  | 2.641961  | -0.909358 |
| H  | 5.816537  | 4.616247  | 0.575741  |
| H  | 3.5785    | 5.582948  | 1.013504  |
| H  | 1.56762   | 4.568531  | -0.019207 |
| H  | -3.91468  | -0.417988 | -3.019894 |
| H  | -2.701937 | -2.12718  | -1.583396 |
| H  | -1.356005 | -2.104039 | -2.719284 |

|   |           |           |           |
|---|-----------|-----------|-----------|
| H | -0.348355 | -6.286609 | -0.870327 |
| H | 0.863531  | -5.314216 | -1.733286 |
| H | -2.52948  | -3.939305 | -0.152982 |
| H | -1.939318 | -3.551533 | 1.479265  |
| H | -1.999459 | -5.249521 | 0.949105  |
| H | 1.752077  | -2.484913 | 2.396419  |
| H | 0.706943  | -3.119491 | 4.636588  |
| H | -1.630221 | -2.113908 | 4.904895  |
| H | -2.888586 | -0.999279 | 1.569415  |
| H | -3.129403 | -0.514946 | 3.246535  |
| H | -1.698492 | 0.967452  | 0.987498  |
| H | -1.374872 | 2.0165    | 3.710991  |
| H | 0.737958  | 2.925321  | 4.208023  |
| H | 1.967276  | 2.886067  | 2.910377  |
| H | 0.605551  | 4.005271  | 2.807236  |
| H | -3.52145  | 0.906426  | -0.031726 |
| H | -4.785532 | 3.361483  | 0.371164  |
| H | -6.269046 | 3.805114  | -0.490706 |
| H | -4.881145 | 5.076069  | -1.984152 |
| H | -3.988371 | 4.24329   | -3.212877 |
| H | 3.198417  | -1.58879  | -4.372072 |
| H | -0.864253 | -5.043924 | -2.050288 |
| H | -2.95561  | 1.545751  | 2.110453  |
| H | 1.77727   | 2.582217  | -1.485429 |
| H | -5.856472 | 2.08947   | -0.231389 |
| H | -2.591059 | -0.487103 | -4.178905 |
| H | -3.582209 | -1.938131 | -3.897309 |
| F | -4.020539 | 1.324145  | 0.637324  |

**S-F114N oxidized**

|   |           |           |           |
|---|-----------|-----------|-----------|
| C | -0.887787 | 1.155776  | 4.445049  |
| C | -0.871507 | 0.38241   | 3.156023  |
| O | -0.397117 | 0.871489  | 2.123226  |
| N | -1.389106 | -0.865129 | 3.174293  |
| C | -1.737754 | -1.55436  | 1.927907  |
| C | -0.88531  | -2.816123 | 1.673425  |
| C | 0.571193  | -2.634143 | 1.961103  |
| N | 1.329274  | -1.625905 | 1.38055   |
| C | 1.37821   | -3.349629 | 2.807742  |
| C | 2.559124  | -1.736707 | 1.861888  |
| N | 2.628647  | -2.766911 | 2.731287  |
| C | -5.901385 | -1.362369 | -0.205734 |
| C | -5.482899 | -0.297189 | -1.208681 |



|    |           |           |           |
|----|-----------|-----------|-----------|
| O  | -4.472662 | -0.421494 | -1.896645 |
| N  | -6.276816 | 0.766856  | -1.29238  |
| C  | -1.873535 | -0.732406 | -3.964688 |
| C  | -0.771907 | -0.972581 | -2.935372 |
| S  | -1.103893 | -0.070901 | -1.353735 |
| C  | -0.118154 | 4.190855  | 1.166541  |
| C  | 3.236007  | 2.107416  | -3.546547 |
| C  | 2.437729  | 1.314303  | -2.508584 |
| C  | 2.754544  | 1.672829  | -1.087219 |
| N  | 2.081099  | 1.104859  | -0.010589 |
| C  | 3.647837  | 2.589247  | -0.591864 |
| C  | 2.538539  | 1.682147  | 1.092794  |
| N  | 3.504675  | 2.568508  | 0.783046  |
| C  | 3.570126  | -2.631333 | -2.972322 |
| S  | 2.737762  | -2.414923 | -1.366369 |
| C  | 2.13933   | -4.123237 | -1.116034 |
| Cu | 0.614929  | -0.279829 | 0.02666   |
| H  | 2.148228  | 1.521543  | 2.085763  |
| H  | 3.946298  | 3.19984   | 1.436615  |
| H  | 4.361477  | 3.23054   | -1.084221 |
| H  | 2.599026  | 0.239108  | -2.656679 |
| H  | 1.363633  | 1.478157  | -2.667199 |
| H  | 2.948583  | 1.80635   | -4.558083 |
| H  | 4.313733  | 1.937633  | -3.441994 |
| H  | -1.859364 | 2.270117  | -1.922653 |
| H  | -2.856141 | -0.997108 | -3.567347 |
| H  | -0.675319 | -2.034843 | -2.691199 |
| H  | 0.20323   | -0.639117 | -3.303733 |
| H  | 4.372051  | -3.371325 | -2.896473 |
| H  | 4.011492  | -1.669724 | -3.246627 |
| H  | 1.427771  | -4.407818 | -1.896211 |
| H  | 1.639435  | -4.15235  | -0.145226 |
| H  | 2.9761    | -4.826878 | -1.10576  |
| H  | 3.400617  | -1.117846 | 1.5937    |
| H  | 3.459734  | -3.069953 | 3.220347  |
| H  | 1.175384  | -4.197596 | 3.44337   |
| H  | -1.043676 | -3.13476  | 0.634871  |
| H  | -1.253787 | -3.635807 | 2.300135  |
| H  | -1.652402 | -0.821533 | 1.137678  |
| H  | -1.858626 | -1.16323  | 4.018553  |
| H  | -1.627413 | 0.788063  | 5.162214  |
| H  | 0.100319  | 1.111801  | 4.918991  |
| H  | -1.090905 | 2.203752  | 4.205293  |

|   |           |           |           |
|---|-----------|-----------|-----------|
| H | -2.983439 | -1.609502 | -0.23397  |
| H | -5.547256 | -1.108147 | 0.793193  |
| H | -6.997047 | -1.431624 | -0.16175  |
| H | -7.121675 | 0.861949  | -0.749573 |
| H | -6.030742 | 1.512101  | -1.930253 |
| H | 3.050343  | 3.183414  | -3.456917 |
| H | 2.863266  | -2.932302 | -3.7505   |
| H | -2.764119 | -1.852624 | 2.044899  |
| H | -5.497435 | -2.324349 | -0.498885 |
| H | -1.906791 | 0.320168  | -4.265683 |
| H | -1.6745   | -1.334815 | -4.859294 |
| F | -1.955638 | 3.192647  | -2.026937 |
| F | -3.554128 | -1.97823  | 0.405999  |
| O | -0.779079 | 4.397748  | 2.181287  |
| N | 1.075047  | 4.767663  | 1.05219   |
| H | 1.248846  | 5.51062   | 1.719083  |
| H | 1.493976  | 4.889291  | 0.138511  |
| C | -0.654144 | 3.29208   | 0.061756  |
| H | -0.686311 | 2.278498  | 0.458923  |
| H | -1.666139 | 3.625237  | -0.125479 |
| H | -0.065832 | 3.330085  | -0.854276 |

**S-F114N reduced**

|   |           |           |           |
|---|-----------|-----------|-----------|
| C | -0.792918 | 1.277466  | 4.43268   |
| C | -0.830744 | 0.486819  | 3.147659  |
| O | -0.329628 | 0.92595   | 2.11444   |
| N | -1.434289 | -0.725445 | 3.191679  |
| C | -1.856272 | -1.389842 | 1.951142  |
| C | -1.15829  | -2.747588 | 1.729197  |
| C | 0.307944  | -2.721858 | 2.027687  |
| N | 1.161628  | -1.794386 | 1.451354  |
| C | 1.025757  | -3.516417 | 2.886655  |
| C | 2.361473  | -2.025622 | 1.949776  |
| N | 2.330111  | -3.059895 | 2.828501  |
| C | -5.995446 | -0.899926 | -0.182475 |
| C | -5.496466 | 0.116309  | -1.199297 |
| O | -4.50013  | -0.095473 | -1.886165 |
| N | -6.204821 | 1.238064  | -1.296257 |
| C | -1.904166 | -0.739178 | -3.985971 |
| C | -0.832742 | -0.992196 | -2.925281 |
| S | -1.131307 | -0.013305 | -1.385229 |
| C | 0.206711  | 4.200784  | 1.114908  |
| C | 3.380193  | 1.801072  | -3.572811 |

|    |           |           |           |
|----|-----------|-----------|-----------|
| C  | 2.583408  | 1.117797  | -2.459116 |
| C  | 2.994097  | 1.508628  | -1.070477 |
| N  | 2.339106  | 0.990916  | 0.038617  |
| C  | 3.963573  | 2.384604  | -0.643866 |
| C  | 2.887769  | 1.549815  | 1.100019  |
| N  | 3.892373  | 2.388411  | 0.740048  |
| C  | 3.343397  | -2.94155  | -2.937759 |
| S  | 2.52388   | -2.661584 | -1.337339 |
| C  | 1.311062  | -4.021784 | -1.404354 |
| Cu | 0.644149  | -0.302619 | 0.043769  |
| H  | 2.556378  | 1.411008  | 2.118431  |
| H  | 4.413     | 2.987449  | 1.363219  |
| H  | 4.690872  | 2.974303  | -1.180035 |
| H  | 2.661146  | 0.027748  | -2.553388 |
| H  | 1.512611  | 1.333929  | -2.56556  |
| H  | 3.022688  | 1.474246  | -4.554473 |
| H  | 4.449824  | 1.563741  | -3.510806 |
| H  | -1.68428  | 2.382813  | -1.948309 |
| H  | -2.902092 | -0.9431   | -3.589042 |
| H  | -0.814582 | -2.05627  | -2.662851 |
| H  | 0.159305  | -0.745138 | -3.321061 |
| H  | 3.800312  | -3.935196 | -2.99152  |
| H  | 4.133108  | -2.190752 | -3.032772 |
| H  | 0.605797  | -3.872133 | -2.227114 |
| H  | 0.762959  | -4.007169 | -0.460449 |
| H  | 1.810495  | -4.989849 | -1.511898 |
| H  | 3.261869  | -1.489696 | 1.69023   |
| H  | 3.12345   | -3.450281 | 3.315203  |
| H  | 0.732961  | -4.339186 | 3.520943  |
| H  | -1.338916 | -3.043995 | 0.688518  |
| H  | -1.623601 | -3.516306 | 2.359158  |
| H  | -1.653461 | -0.703721 | 1.136224  |
| H  | -1.930951 | -0.965747 | 4.038342  |
| H  | -1.565001 | 0.980329  | 5.150437  |
| H  | 0.185256  | 1.160998  | 4.915608  |
| H  | -0.909987 | 2.33435   | 4.175879  |
| H  | -3.105832 | -1.375    | -0.20915  |
| H  | -5.607434 | -0.665641 | 0.808539  |
| H  | -7.094238 | -0.878224 | -0.130946 |
| H  | -6.931746 | 1.470217  | -0.636059 |
| H  | -5.819268 | 1.988718  | -1.854366 |
| H  | 3.275332  | 2.891972  | -3.530134 |
| H  | 2.64184   | -2.816598 | -3.768974 |

|   |           |           |           |
|---|-----------|-----------|-----------|
| H | -2.912836 | -1.551641 | 2.063752  |
| H | -5.666892 | -1.89322  | -0.465159 |
| H | -1.88961  | 0.308071  | -4.309899 |
| H | -1.732584 | -1.371105 | -4.869647 |
| F | -1.708237 | 3.308637  | -2.064418 |
| F | -3.702621 | -1.689712 | 0.435835  |
| O | -0.434411 | 4.47174   | 2.127272  |
| N | 1.441207  | 4.680931  | 0.99247   |
| H | 1.721227  | 5.377771  | 1.669296  |
| H | 1.941917  | 4.640637  | 0.115698  |
| C | -0.399689 | 3.332642  | 0.022095  |
| H | -0.436906 | 2.306415  | 0.386846  |
| H | -1.411389 | 3.690155  | -0.119245 |
| H | 0.149722  | 3.371182  | -0.916153 |

**S-N47S oxidized**

|   |           |           |           |
|---|-----------|-----------|-----------|
| C | 2.526546  | -3.686396 | -0.517283 |
| C | 1.299622  | -2.96294  | -0.030065 |
| O | 1.303284  | -1.736446 | 0.125962  |
| N | 0.210323  | -3.710652 | 0.252073  |
| C | -0.880066 | -3.169904 | 1.07379   |
| C | -2.202473 | -3.035597 | 0.291805  |
| C | -2.027233 | -2.460375 | -1.077463 |
| N | -1.417943 | -1.23235  | -1.303183 |
| C | -2.384845 | -2.994386 | -2.288134 |
| C | -1.412923 | -1.035315 | -2.615349 |
| N | -1.98686  | -2.081321 | -3.244858 |
| C | -2.48053  | 1.775785  | 4.129585  |
| C | -2.362131 | 1.422574  | 2.648196  |
| S | -0.921644 | 0.30974   | 2.330127  |
| C | 3.933423  | 0.42806   | 0.765141  |
| C | 4.333728  | 1.361424  | -0.18592  |
| C | 4.666293  | -0.746916 | 0.898529  |
| C | 5.445533  | 1.131721  | -0.99016  |
| C | 5.780762  | -0.985533 | 0.096827  |
| C | 6.170257  | -0.045443 | -0.846055 |
| C | -0.121915 | 4.953296  | -0.173359 |
| C | -0.22873  | 3.446449  | 0.072899  |
| C | 0.557044  | 2.616977  | -0.897764 |
| N | 0.522976  | 1.227149  | -0.885582 |
| C | 1.454743  | 3.006588  | -1.859348 |
| C | 1.393597  | 0.796361  | -1.789944 |
| N | 1.95897   | 1.845917  | -2.416127 |

|    |           |           |           |
|----|-----------|-----------|-----------|
| C  | -4.252047 | 2.840252  | -1.345607 |
| S  | -3.216858 | 1.356733  | -1.426237 |
| C  | -4.504762 | 0.11947   | -1.035728 |
| Cu | -0.646106 | -0.020575 | 0.154829  |
| H  | 1.651967  | -0.236876 | -1.958952 |
| H  | 2.731103  | 1.787285  | -3.06589  |
| H  | 1.767214  | 3.98491   | -2.187408 |
| H  | -1.282525 | 3.142533  | 0.047289  |
| H  | 0.131647  | 3.215137  | 1.084763  |
| H  | -0.722844 | 5.501496  | 0.557791  |
| H  | -0.481598 | 5.222493  | -1.172893 |
| H  | 3.795652  | 2.303054  | -0.268501 |
| H  | 5.765211  | 1.882368  | -1.709605 |
| H  | 7.048921  | -0.222674 | -1.461004 |
| H  | 6.355433  | -1.899421 | 0.223377  |
| H  | 4.379803  | -1.473695 | 1.654611  |
| H  | 1.094799  | 1.263618  | 3.505254  |
| H  | -2.622446 | 0.881723  | 4.744912  |
| H  | -3.261942 | 0.917486  | 2.285018  |
| H  | -2.22322  | 2.321185  | 2.041183  |
| H  | -5.077731 | 2.775334  | -2.059561 |
| H  | -3.629481 | 3.698011  | -1.612986 |
| H  | -4.841086 | 0.213866  | 0.000658  |
| H  | -4.063366 | -0.865356 | -1.1894   |
| H  | -5.357806 | 0.235372  | -1.709583 |
| H  | -1.037955 | -0.159665 | -3.120869 |
| H  | -2.133339 | -2.160112 | -4.242082 |
| H  | -2.865406 | -3.926877 | -2.540385 |
| H  | -2.897975 | -2.428886 | 0.885273  |
| H  | -2.666764 | -4.022185 | 0.191172  |
| H  | -0.525787 | -2.229608 | 1.473568  |
| H  | 0.311348  | -4.716344 | 0.221781  |
| H  | 2.38268   | -4.764682 | -0.632905 |
| H  | 2.845761  | -3.266548 | -1.475753 |
| H  | 3.340121  | -3.508668 | 0.191986  |
| H  | -1.686326 | -2.101861 | 3.180377  |
| H  | 0.911543  | 5.303244  | -0.076967 |
| H  | -4.651626 | 2.996777  | -0.339031 |
| H  | -1.014954 | -3.881065 | 1.87      |
| H  | 3.1066    | 0.640489  | 1.436651  |
| H  | -1.586325 | 2.296555  | 4.485992  |
| H  | -3.343282 | 2.433457  | 4.284958  |
| F  | 1.904417  | 1.653903  | 3.757049  |

|   |           |           |          |
|---|-----------|-----------|----------|
| F | -1.721619 | -3.023385 | 3.324435 |
|---|-----------|-----------|----------|

S-N47S reduced

|    |           |           |           |
|----|-----------|-----------|-----------|
| C  | 2.483273  | -3.728564 | -0.533006 |
| C  | 1.250771  | -2.982715 | -0.072037 |
| O  | 1.281286  | -1.77093  | 0.126793  |
| N  | 0.136355  | -3.719637 | 0.154646  |
| C  | -0.949238 | -3.18406  | 0.99168   |
| C  | -2.278692 | -3.039831 | 0.225972  |
| C  | -2.100837 | -2.464474 | -1.142685 |
| N  | -1.435772 | -1.266506 | -1.352862 |
| C  | -2.479425 | -2.986131 | -2.354495 |
| C  | -1.414182 | -1.07357  | -2.65816  |
| N  | -2.034509 | -2.089934 | -3.309865 |
| C  | -2.713262 | 1.763996  | 4.079268  |
| C  | -2.462435 | 1.418404  | 2.61192   |
| S  | -1.008857 | 0.29897   | 2.399753  |
| C  | 3.935038  | 0.328847  | 0.874988  |
| C  | 4.374229  | 1.275676  | -0.045098 |
| C  | 4.643035  | -0.862395 | 0.998033  |
| C  | 5.499963  | 1.043265  | -0.828923 |
| C  | 5.771211  | -1.103823 | 0.2166    |
| C  | 6.19953   | -0.150252 | -0.695401 |
| C  | -0.014142 | 4.94945   | -0.051467 |
| C  | -0.146439 | 3.42895   | 0.039905  |
| C  | 0.684694  | 2.675142  | -0.954534 |
| N  | 0.632774  | 1.290087  | -1.01803  |
| C  | 1.598506  | 3.126623  | -1.875741 |
| C  | 1.503919  | 0.916924  | -1.935506 |
| N  | 2.102041  | 1.996833  | -2.498988 |
| C  | -4.15396  | 2.941286  | -1.365351 |
| S  | -3.165329 | 1.415252  | -1.424011 |
| C  | -4.469269 | 0.250941  | -0.896398 |
| Cu | -0.595183 | 0.02452   | 0.146228  |
| H  | 1.749923  | -0.105569 | -2.179583 |
| H  | 2.858451  | 1.971717  | -3.166562 |
| H  | 1.926303  | 4.119509  | -2.141021 |
| H  | -1.19358  | 3.12989   | -0.087642 |
| H  | 0.130438  | 3.083737  | 1.044428  |
| H  | -0.642595 | 5.435038  | 0.701744  |
| H  | -0.321291 | 5.323592  | -1.036099 |
| H  | 3.839997  | 2.218291  | -0.133619 |

|   |           |           |           |
|---|-----------|-----------|-----------|
| H | 5.842135  | 1.799869  | -1.532208 |
| H | 7.086088  | -0.332978 | -1.298814 |
| H | 6.320928  | -2.03548  | 0.329052  |
| H | 4.315014  | -1.606173 | 1.719561  |
| H | 1.049509  | 1.155768  | 3.56833   |
| H | -2.903634 | 0.859963  | 4.668281  |
| H | -3.347949 | 0.93505   | 2.184614  |
| H | -2.287141 | 2.334193  | 2.037416  |
| H | -5.01744  | 2.884771  | -2.035787 |
| H | -3.510826 | 3.76257   | -1.693638 |
| H | -4.71039  | 0.389001  | 0.161684  |
| H | -4.082206 | -0.756951 | -1.049328 |
| H | -5.370895 | 0.382111  | -1.502663 |
| H | -0.981533 | -0.220609 | -3.158356 |
| H | -2.173178 | -2.15955  | -4.307204 |
| H | -3.005074 | -3.891944 | -2.615618 |
| H | -2.943861 | -2.411822 | 0.830533  |
| H | -2.768709 | -4.01682  | 0.130973  |
| H | -0.607576 | -2.227007 | 1.37053   |
| H | 0.215215  | -4.724559 | 0.080421  |
| H | 2.266859  | -4.722639 | -0.939979 |
| H | 3.007988  | -3.134572 | -1.2848   |
| H | 3.162714  | -3.843012 | 0.318955  |
| H | -1.784378 | -2.148698 | 3.103326  |
| H | 1.018859  | 5.273149  | 0.123285  |
| H | -4.494718 | 3.152844  | -0.346799 |
| H | -1.06874  | -3.888517 | 1.795422  |
| H | 3.086216  | 0.536748  | 1.520076  |
| H | -1.843906 | 2.267516  | 4.515818  |
| H | -3.582229 | 2.428898  | 4.182243  |
| F | 1.860081  | 1.52501   | 3.84733   |
| F | -1.839827 | -3.072403 | 3.225392  |

### Supporting Information References:

- (1) Schutz, C. N.; Warshel, A. *Proteins: Struct., Funct., Bioinf.* **2004**, *55*, 711.
- (2) Warshel, A.; Papazyan, A. *Proc. Natl. Acad. Sci. U. S. A.* **1996**, *93*, 13665.
- (3) Dey, A.; Okamura, T.; Ueyama, N.; Hedman, B.; Hodgson, K. O.; Solomon, E. I. *J. Am. Chem. Soc.* **2005**, *127*, 12046.
- (4) Dey, A.; Green, K. N.; Jenkins, R. M.; Jeffrey, S. P.; Darensbourg, M.; Hodgson, K. O.; Hedman, B.; Solomon, E. I. *Inorg. Chem. (Washington, DC, U. S.)* **2007**, *46*, 9655.
- (5) Dey, A.; Jenney, F. E., Jr.; Adams, M. W. W.; Babini, E.; Takahashi, Y.; Fukuyama, K.; Hodgson, K. O.; Hedman, B.; Solomon, E. I. *Science (Washington, DC, U. S.)* **2007**, *318*, 1464.

(6) Dey, A.; Jenney, F. E., Jr.; Adams, M. W. W.; Johnson, M. K.; Hodgson, K. O.; Hedman, B.; Solomon, E. I. *J. Am. Chem. Soc.* **2007**, *129*, 12418.

(7) Dey, A.; Jiang, Y.; Ortiz, d. M. P.; Hodgson, K. O.; Hedman, B.; Solomon, E. I. *J. Am. Chem. Soc.* **2009**, *131*, 7869.

(8) Dey, A.; Hocking, R. K.; Larsen, P.; Borovik, A. S.; Hodgson, K. O.; Hedman, B.; Solomon, E. I. *J. Am. Chem. Soc.* **2006**, *128*, 9825.
